1 **Low aflatoxin levels and flowering delay in *Aspergillus flavus*-**  
2 **resistant maize lines are correlated with increased corn earworm**  
3 **damage and enhanced seed fumonisin content**

4 Subbaiah Chalivendra<sup>1,\*</sup>, Fangneng Huang<sup>2</sup>, Mark Busman<sup>3</sup>, W. Paul Williams<sup>4</sup>  
5 Jong Hyun Ham<sup>1</sup> and Geromy G. Moore<sup>5</sup>

6 <sup>1</sup>Department of Plant Pathology and Crop Physiology, Louisiana State University  
7 AgCenter, Baton Rouge, LA 70803, USA

8 <sup>2</sup>Department of Entomology, Louisiana State University AgCenter, Baton Rouge,  
9 LA 70803, USA

10 <sup>3</sup>Bacterial Foodborne Pathogens and Mycology Research Unit, USDA-ARS-  
11 NCAUR, Peoria, IL 61604, USA

12 <sup>4</sup>USDA-ARS, Corn Host Plant Resistance Research Unit, Mississippi State, MS  
13 39762, USA

14 <sup>5</sup>USDA-ARS, Southern Regional Research Center, New Orleans, LA 70124, USA

15 \*Author to whom correspondence should be addressed:

16 [schalivendra@agcenter.lsu.edu](mailto:schalivendra@agcenter.lsu.edu)

17

18

19 **Keywords & Research Areas:** Maize (*Zea mays*), *Aspergillus flavus*, *Fusarium*  
20 *verticillioides*, ear rot, resistant and susceptible lines, corn earworm (*Helicoverpa*  
21 *zea* Boddie), aflatoxin toxicity, fumonisin tolerance

22 **ABSTRACT**

23 Preharvest mycotoxin contamination of field-grown crops is influenced not only  
24 by the host genotype, but also inoculum load, insect pressure and their  
25 confounding interactions with seasonal weather. In two field trials, we observed  
26 a preferred natural infestation of specific maize (*Zea mays* L.) genotypes by corn  
27 earworm (*Helicoverpa zea* Boddie) and investigated this unexpected interaction.  
28 These studies involved four maize lines with contrasting levels of resistance to  
29 *Aspergillus flavus*. The resistant lines had 7 to 14-fold greater infested ears than  
30 the susceptible lines. However, seed aflatoxin B<sub>1</sub> levels, in mock- or *A. flavus*-  
31 inoculated ears were consistent with maize genotype resistance to *A. flavus*.  
32 Further, the corn earworm-infested ears had greater levels of fumonisin content  
33 in seeds than uninfested ears, indicating that the insect may have vectored native  
34 *Fusarium verticillioides* inoculum. The two maize lines with heavy infestation  
35 showed delayed flowering. The availability of young silk for egg-laying could have  
36 been a factor in the pervasive corn earworm damage of these lines. At the same  
37 time, *H. zea* larvae reared on AF-infused diet showed decreasing mass with  
38 increasing AF and >30% lethality at 250 ppb. In contrast, corn earworm was  
39 tolerant to fumonisin with no significant loss in mass even at 100 ppm,  
40 implicating the low seed aflatoxin content as a predominant factor for the  
41 prevalence of corn earworm infestation and the associated fumonisin  
42 contamination in *A. flavus* resistant lines. These results highlight the need for  
43 integrated strategies targeting mycotoxigenic fungi and their insect vectors to  
44 enhance the safety of crop commodities.

45 **IMPORTANCE:** *Aspergillus* and *Fusarium* spp. not only cause ear rots in maize  
46 leading to crop loss, they can also contaminate the grain with carcinogenic  
47 mycotoxins. Incorporation of genetic resistance into breeding lines is an ideal  
48 solution for mycotoxin mitigation. However, the goal is fraught by a major  
49 problem. Resistance for AF or FUM accumulation is quantitative and contributed  
50 by several loci with small effects. Our work reveals that host phenology  
51 (flowering time) and insect vector-mycotoxin interactions can further confound  
52 breeding efforts. A host genotype even with demonstrable resistance can become  
53 vulnerable due to seasonal variation in flowering time or an outbreak of chewing  
54 insects. Incorporation of resistance to a single mycotoxin accumulation and not  
55 pairing it with insect resistance may not adequately ensure food safety. Diverse  
56 strategies including host-induced silencing of genes essential for fungal and  
57 insect pest colonization and broad-spectrum biocontrol systems need to be  
58 considered for robust mycotoxin mitigation.

59 **INTRODUCTION**

60 Besides causing crop damage and economic loss to the grower, mycotoxigenic  
61 fungi pose a serious risk to human and livestock health due to the contamination  
62 of commodities with carcinogenic and neurotoxic secondary metabolites known  
63 as mycotoxins. Aflatoxin B<sub>1</sub> (AF) is the most dangerous among mycotoxins due  
64 to its very potent carcinogenicity. *Aspergillus flavus*, an opportunistic pathogen,  
65 is the predominant species that contaminates cereal and oil seed crops with AF.  
66 Although not as genotoxic as AF, fumonisins (FUM) are associated with  
67 esophageal cancer, particularly due to cytotoxicity of fumonisin B<sub>1</sub> (FB<sub>1</sub>). They are  
68 also among the most common food- and feed-contaminating mycotoxins in many  
69 countries ([BIOMIN Mycotoxin Survey 2015](#)). FUM are produced by *Fusarium*  
70 species, *F. verticillioides* (formerly known as *F. moniliforme*) being the  
71 predominant contaminant of commodities ([Munkvold 2003](#)). *A. flavus* and *F.*  
72 *verticillioides* cause ear rots in maize (*Zea mays* L.), a globally important food,  
73 feed and fuel crop of high productivity. Co-contamination of commodities with  
74 AF and FUM has been reported, particularly, in high cancer-risk areas ([Sun et al.](#)  
75 [2011](#); [Shirima et al. 2013](#); [Guo et al. 2017](#)). Studies in animal models indicate an  
76 additive or even synergistic effect on liver cancer due to an exposure to both  
77 mycotoxins ([Lopez-Garcia 1998](#); [World Health Organization 2018](#)).

78        *Aspergillus* and *Fusarium* ear rots are more frequent in warmer and drier  
79 cropping seasons or a warmer and wetter weather combination at the time of  
80 harvest, and are often exacerbated by insect damage. Insect-vectored inoculum

81 can breach the natural plant defense. The invasive methods of inoculation by  
82 chewing and piercing insects would bypass resistance mechanisms, such as  
83 remote defense signals triggered in the husk, silk or seed surface in response to  
84 natural infection. Consequently, ear rot diseases are more common in the  
85 southern United States (US) and lowland tropics (Miller, 1994; reviewed in Cotty  
86 and Jaime-Garcia 2007; Santiago et al. 2015). Among insect pests infesting maize,  
87 European Corn Borer (ECB) causes the most serious damage (Boyd and Bailey,  
88 2001; Hutchison et al. 2010). It not only injures plants, exposing them to  
89 infection, but also vectors ear rot and stalk rot fungi, particularly *F. verticillioides*  
90 and *F. graminearum* (Widstrom 1992). Extensive use of Bt (*Bacillus thuringiensis*  
91 Crystal proteins-expressing) maize with its high efficacy against ECB, has  
92 reduced overall ECB populations in the US (Hutchison et al. 2010). Maize pests  
93 previously considered as secondary to ECB are now taking its position (Bowers et  
94 al. 2014). Corn earworm [CEW; *Helicoverpa zea* (Boddie); formerly in the genus  
95 *Heliothis*] has become the most economically important pest in the southern  
96 United States where non-freezing winters are conducive for CEW to multiply by  
97 4-7 generations in a year. Resistance of this pest to a wide range of insecticides  
98 and to Bt maize has also been documented (Capinera 2004; Dively et al. 2016;  
99 Kaur et al. 2019). Although CEW has multiple crop and weed hosts, maize is its  
100 preferred host (Johnson et al. 1975). Annual yield loss due to CEW ranges from  
101 2-17% for field corn and up to 50% in sweetcorn in the southern US. *A. flavus* and  
102 *F. verticillioides* invade the seed through silk and are also vectored by CEW and  
103 other ear-infesting insects (Munkvold and White 2016). *F. verticillioides* can grow

104 also as an endophyte through root or stem infection, and is vectored also by  
105 insects such as ECB that feed on vegetative tissues (Blacutt et al. 2018). Unlike a  
106 strong association observed in the case of FUM contamination (e.g., Smeltzer  
107 1959; Dowd 2000; Mesterházy et al. 2012), seed AF levels were poorly correlated  
108 with CEW damage caused by either natural invasion (Ni et al. 2011) or manual  
109 infestation (Lillehoj et al. 1984). A meta-analysis of published work showed a 59%  
110 reduction in the mean FB<sub>1</sub> concentration in Bt maize compared to the non-Bt  
111 control (Cappelle 2018). A complete mitigation of AF or FUM, requires control of  
112 multiple pests, including CEW (Abbas et al. 2013; Bowers et al. 2014; Porter and  
113 Bynum 2018).

114 In addition to facilitating fungal colonization, insect infestation can also  
115 enhance mycotoxin production in host tissues (Döll et al. 2013; Drakulic et al.  
116 2015, 2016). In turn, mycotoxigenic fungi can affect insect vector infestation by  
117 inducing volatile production in host tissues. This is particularly well documented  
118 in the case of *Fusarium* species (Schulthess et al. 2002; Piesik et al. 2011; Drakulic  
119 et al. 2016). For example, pre-inoculation of maize with *F. verticillioides* was  
120 shown to enhance the fecundity and rate of development in Lepidopteran and  
121 Coleopteran pests (Ako et al. 2003), while retarding larval development in  
122 western corn rootworm (*Diabrotica virgifera virgifera*; Kurtz et al. 2010). We  
123 observed a preferential CEW infestation and increased FUM contamination in *A.*  
124 *flavus* resistant maize lines in our field trials. This previously unreported or  
125 overlooked observation was pursued to unravel the factors underlying this novel  
126 host-pathogen-insect interaction. Although late flowering might have facilitated

127 enhanced oviposition by *H. zea* in these maize lines, our analysis suggests that  
128 the toxicity of AF to CEW is a more compelling reason for the observed prevalence  
129 of ear damage in the low AF-accumulating genotypes.

## 130 RESULTS

### 131 Unusual weather pattern and corn earworm outbreak in 2018 summer

132 During the summer of 2018, daily profiles of rain fall and air temperature  
133 patterns were different from past years' average in Louisiana as well as many of  
134 the maize-growing states in US. The growing season was shorter (late April to  
135 early August) due to extended cold temperatures into the beginning of the  
136 planting season and relatively warmer and drier days during the early crop  
137 growth period (**Fig. S1**). April 2018 was the coldest April month since 1997 based  
138 on US average temperatures (and for Iowa and Wisconsin, it was the coldest April  
139 since records began in 1895). In contrast, May 2018 was the hottest May on  
140 record, breaking the record set in May 1934 during the Dust Bowl (National  
141 Oceanic and Atmospheric Administration: <https://www.noaa.gov/>). The  
142 unseasonal and steep warming after protracted cold seems to have favored an  
143 explosion of CEW population as indicated by a heavy infestation of ears in both  
144 of our experimental plots. CEW incidence was also reported from maize fields in  
145 other states in southern ([Porter and Bynum 2018](#)) as well as northern US (e.g.,  
146 [Handley 2018](#)). In spite of two applications of a strong broad-spectrum  
147 insecticide before and after silking, the insecticide seems to have failed to reach  
148 silks covered by the husks. Further, all ears were bagged immediately after



149 inoculation/pollination, which concealed earworm damage until developing ears  
150 were sampled for analysis.

151 **CEW infestation was significantly greater in *A. flavus* resistant maize lines**

152 During sampling of ears later in the season (July), we noticed that the two  
153 resistant lines, the hybrid Mp313ExMp717 and the inbred CML322 showed  
154 greater infestation by CEW than the susceptible lines GA209xT173 and B73 (**Fig.**  
155 **1**, left panels). The infestation was <10% in susceptible lines and it ranged from  
156 22% to 68% in the resistant lines. The maize lines used in the two field trials have  
157 been extensively validated in the field and are often used as checks for evaluating  
158 new genotypes and in mapping resistance loci (e.g., [Mideros et al. 2012](#); [Guo et](#)  
159 [al. 2017](#)). Despite our concerns that the distinctive patterns of CEW infestation  
160 might potentially interfere with the genetic response of maize lines to *A. flavus*,  
161 AF measurements showed that the genotype responses were robust in spite of  
162 CEW infestation. As described in the **MATERIALS AND METHODS** section, we  
163 harvested and utilized all ears in the plots to obtain robust AF data. The insect  
164 infestation was 8-fold greater in CML322 than observed in B73 ears in the mock-  
165 inoculated set. Inoculation with the highly toxigenic Tox4 strain resulted in a  
166 significant ( $p < 0.01$ ) and nearly 4-fold decrease in the infestation of CML322, but  
167 still 2-fold greater than infestation in B73. This is inversely correlated with >3-  
168 fold increase in seed AF content in Tox4- inoculated CML322 ears. As expected  
169 from its susceptibility to *A. flavus* colonization, B73 seeds accumulated >100 ppb  
170 of AF even in mock-inoculated (Control) ears and >500 ppb in Tox4-inoculated

171 ears. These AF levels are >12-19 fold higher than those measured in CML322  
172 seeds (**Fig. 1B**, right panel). CEW infestation was also greater in the resistant  
173 hybrid (Mp313E x Mp717) than in the susceptible hybrid by >30-fold in the  
174 control set and by 7-fold in the inoculated set (**Fig. 1A**, left panel). Infestation  
175 was inversely correlated with seed AF levels in hybrids as well. The susceptible  
176 hybrid (GA209×T173) had 100 ppb in control seeds and >400 ppb of AF in the  
177 inoculated set (i.e., 3 and 24-fold greater than in the resistant hybrid). Unlike the  
178 resistant inbred CML322, the resistant hybrid showed no difference in either AF  
179 content or CEW infestation between the control and CA14-inoculated ears.  
180 Analysis of variance (ANOVA) confirmed that only the host genotype (i.e.,  
181 resistance to *A. flavus*) affected infestation highly significantly (>99.99%  
182 confidence level) and inoculation-induced differences were not statistically  
183 different (**Table S1 and S2**).

#### 184 **CEW infestation is negatively correlated with seed AF content**

185 Not surprisingly, ANOVA of AF content revealed that the host genotype and  
186 inoculation with toxigenic *A. flavus* strains showed highly significant  
187 independent (or direct) as well as interaction effects on seed AF content. As  
188 indicated by the data presented in Fig. 1, infestation was also significantly related  
189 to AF content, although the interaction effect of genotype with infestation on AF  
190 was not significant (**Tables S3 and S4**). Both the resistant genotypes (CML322 and  
191 Mp313E×Mp717) manifested robust resistance to *A. flavus* and accumulated less  
192 than 30 ppb of AF in the seed either in the control (via colonization of native *A.*

193 *flavus* strains) or the inoculated set. Conversely, the susceptible inbred and  
194 hybrid accumulated 100 and 500 ppb in control and inoculated sets, respectively.  
195 AF content is inversely correlated with CEW infestation pattern in each of the  
196 four maize genotypes. This relationship becomes clear when the data is  
197 combined for control and inoculated sets in each genotype (**Fig. 2**) or when all  
198 data is combined (**Fig. S2**). It is of interest to note that the uninfected controls  
199 from both resistant lines showed a numerical but statistically insignificant  
200 increase in AF in CEW-infested ears. AF was scarcely detectable levels in the  
201 uninfested and uninoculated controls (a mean value of 6 ppb in Mp313E×Mp717  
202 and <1 ppb in CML322) but increased by 5 and 14-fold in infested ears of  
203 resistant hybrid and inbred respectively. This suggested that the resistance to *A.*  
204 *flavus* colonization and AF contamination might have been compromised to  
205 some extent in seeds heavily damaged by CEW.

#### 206 **Kernel fumonisin content was enhanced in CEW-infested ears**

207 *Fusarium verticillioides* is among the most common mycotoxigenic fungi  
208 colonizing field-grown maize. We observed symptoms of *F. verticillioides*  
209 colonization (e.g., star-burst pattern on seeds) in our samples. We isolated the  
210 fungus from seeds with visual symptoms using *Fusarium*-selective Malachite  
211 Green Agar 2.5 medium ([Alborch et al. 2009](#)) and confirmed by genomic PCR  
212 using *F. verticillioides*-specific primers ([Baird et al. 2008](#)). FUM content was  
213 analyzed in the same seed samples used for AF determination (**Fig. 3 A**) and  
214 compared between uninfested and CEW-infested samples (**Fig. 3B**).

215 Both maize hybrids used in this study have been previously shown to be  
216 resistant to FUM accumulation. In particular, Mp313ExMp717 (*A. flavus* resistant  
217 hybrid) was shown to be more robustly resistant than GA209xT173 across  
218 studies ([Williams 2006](#); [Henry et al. 2009](#); [Williams and Windham 2009](#)). In the  
219 current study, however, the Mp313ExMp717 accumulated >7-fold FUM in its  
220 seeds than GA209xT173 (**Fig. 3A**). Although CML322 accumulated a considerable  
221 amount of FUM, it was >4-fold less than that in B73, which is known to be among  
222 the most susceptible inbreds to Fusarium ear rot and FUM accumulation ([Morales](#)  
223 [et al. 2019](#)). However, when the data was parsed based on CEW infestation (only  
224 in sets where both clean and infested ears were available), infested ears showed  
225 >5-fold more FUM than uninfested ears (**Fig. 3B**). The differences were not  
226 significant probably due to the high variability in the colonization by native  
227 strains (the lowest p-value was 0.052 for CML322; also see **Fig. S2**). These data  
228 indicated that CEW may vector *Fusarium* spp. that produce FUM during its  
229 infestation.

230

### 231 **Differential toxicity of AF versus FB1 to CEW**

232 The preferential infestation of *A. flavus* resistant lines by CEW and a negative  
233 correlation between AF and infestation rate, taken together with greater FUM  
234 levels in infested ears, suggested that AF may be more toxic to *H. zea* than FUM.  
235 We tested this hypothesis by feeding experiments where CEW neonates were  
236 reared on artificial diet containing graded levels of AF or FB1. Results shown in  
237 **Fig. 4** and **5** clearly demonstrate that the pest is more susceptible to AF than to

238 FB1. As reported previously (Zeng et al. 2006), AF retarded CEW larval growth  
239 even at the lowest concentration tested, although the effect was not significant  
240 (Fig. 5) and was toxic above 200 ppb (Fig. 4). On the other hand, FB1 was non-  
241 toxic to CEW even at the highest concentration tested. In fact, at lower  
242 concentrations (below 30 ppm) the toxin seems to marginally enhance the growth  
243 of the larvae (the effect was consistent although there was variability among the  
244 bioassays). These results further support the proposal that the enhanced  
245 infestation of *A. flavus* resistant maize lines by *H. zea* may be due to very low  
246 levels of AF that are not inhibitory to larval growth.

247

#### 248 **Delayed flowering in *A. flavus* resistant maize lines**

249 The tassel and ear development were delayed in CML322 by 3 weeks relative to  
250 B73 and by 4-5 weeks in the resistant hybrid, Mp313E×Mp717 compared to  
251 GA209×T173, although all four lines were planted together. CML322 is a tropical  
252 inbred and shows delayed flowering under long days, i.e.,  $\geq 13$  h photoperiod  
253 (Hung et al. 2012). The parents of the resistant hybrid (Mp313Ex Mp717) are also  
254 derived from the tropical maize race Tuxpeño (Scott and Zummo 1990; Williams  
255 and Windham 2006) and known to show late-flowering phenotype. This is true  
256 for most maize lines that are resistant to *A. flavus* and attempts to segregate the  
257 two traits have been of limited success (Henry 2013). The availability of green  
258 silks may be an important factor for the increased *H. zea* infestation of these late  
259 flowering genotypes. However, in an adjacent plot where B73 was planted two

260 weeks later (unrelated to the current study), silk emergence coincided with that  
261 of CML322 plants used in the present study. Nonetheless, B73 ears had highly  
262 elevated levels of seed AF (400 ppb in controls and 800 ppb in inoculated plants)  
263 and low levels of CEW infestation in this plot as well, suggesting that high seed  
264 AF levels may act as a deterrent for CEW infestation because of its toxicity.

265 **DISCUSSION**

266           There are few studies where CEW infestation patterns have been compared  
267 in maize genotypes with varying resistance to *A. flavus* or AF accumulation. Nie  
268 et al (2011) compared spatial patterns of natural infestation of four ear-feeding  
269 insects (CEW, fall armyworm, maize weevil and brown stinkbug) with AF  
270 distribution due to colonization of a single commercial maize hybrid by native  
271 *A. flavus* strains. In the first year of the study, CEW infestation was very extensive  
272 (95% of ears) and in the second year, although less intense, it was as high as 41%.  
273 However, AF contamination was very low in both years (>80% of ears had  $\leq 30$   
274 ppb and only  $\leq 4\%$  ears had  $\leq 100$  ppb). Although the predominantly low AF  
275 content makes it difficult to quantify the relationship, it is strongly indicative of  
276 a negative association between CEW damage and seed AF content. The maize  
277 genotypes in our study have proven resistance or susceptibility to *A. flavus*.  
278 Further, high AF contamination ( $\leq 100$  ppb) in uninoculated as well as inoculated  
279 plots of only susceptible lines allowed to make robust comparisons.

280           The premise for this study is an unprecedented or unreported observation,  
281 in that two unrelated maize lines (Tuxpeño germplasm versus CML) with proven  
282 resistance to *A. flavus* were heavily infested by CEW. Conversely, the two *A. flavus*  
283 susceptible lines (stiff-stalk inbred B73 and non-stiff stalk hybrid GA209 x T173)  
284 were spared from heavy CEW damage. Although late flowering maize is known  
285 to be susceptible to CEW infestation by providing green silks, availability of silks  
286 alone could not fully explain our observations. Late flowering is more often a

287 problem in the northeastern US where it coincides with CEW migration from  
288 southern states. Furthermore, late planted B73 in an adjacent plot had delayed  
289 silk emergence but showed no CEW infestation. The other and more likely  
290 explanation is that the susceptible lines had very high levels of AF that were toxic  
291 to CEW. Even mock-inoculated controls had 100 ng of AF per gram of seed meal  
292 prepared from entire ears with both moldy and non-moldy seeds. This argument  
293 is supported by previous studies on AF toxicity to CEW in feeding experiments  
294 ([Zeng et al. 2006](#)) as well as our current work (**Fig. 4** and **5**). Zeng et al (2006)  
295 showed that AF at 200 ppb strongly inhibited the growth and development of  
296 first instar larvae, leading to >50% larval death after 9 d and 100% death after 15  
297 d of feeding. Even lower concentrations (1-20 ppb; FDA-regulated levels) affected  
298 larval development, delayed pupation rate and led to >40% mortality when the  
299 exposure was longer than 7 d ([Zeng et al. 2006](#)). Although concentrations below  
300 20 ppb were not tested in our study, we observed a steady decline in larval mass  
301 as AF concentration increased with  $\geq 30\%$  mortality at or above 250 ppb during  
302 10-15 d exposure (**Fig. 5**). We did not continue our observations beyond the larval  
303 stage to assess the longer term developmental effects (e.g., pupation or  
304 emergence of adults). An apparent exception to the correlation between low AF  
305 and high CEW infestation was a significant decrease in CEW infestation observed  
306 in TOX4-inoculated ears compared to uninoculated ears in the *A. flavus* resistant  
307 inbred CML322, although average AF levels did not exceed 30 ppb. Given the  
308 highly variable distribution of AF in individual kernels of a maize ear (e.g., Lee et  
309 al. 1980), it is possible that AF content particularly in damaged kernels (close to



310 the silk canal, the site of inoculation as well as CEW infestation) was much greater  
311 than the average for the entire ear and high enough to be toxic to CEW survival.  
312 Furthermore, CEW may be sensitive also to other anti-insectan compounds made  
313 by *A. flavus* (Cary et al. 2018) that could act additively or synergistically with AF  
314 (e.g., Kojic acid; Dowd 1988). Future experiments would involve late-maturing  
315 lines with *A. flavus* susceptibility and early maturing lines with *A. flavus*  
316 resistance to clarify and quantify the effects of flowering time and AF content on  
317 CEW infestation.

318 It is not surprising that AF is toxic to insects, not merely to mammals. *A.*  
319 *flavus* is predominantly a soil-living saprophyte, feeding on decaying organic  
320 matter, including dead insects. It is also an opportunistic pathogen and can  
321 colonize a wide variety of insects, e.g., moths, silkworms, bees, grasshoppers,  
322 houseflies and mealy bugs among others (St. Leger et al. 2000; Gupta and Gopal  
323 2002 and references therein). At the same time, *A. flavus* is known to survive  
324 ingestion by mycophagous insects. Among three *Aspergillus* species tested, *A.*  
325 *flavus* conidia phagocytized by insect hemocytes were still able to germinate (St.  
326 Leger et al. 2000). *A. flavus* may also proliferate in the hindgut of CEW (Abel et  
327 al., 2002). In spite of being a polyphagous pest with a remarkable capacity to  
328 metabolize a wide array of plant compounds, CEW has limited tolerance to AF  
329 and poor ability to metabolize the mycotoxin (Dowd 1988; Zeng et al. 2006). The  
330 fungus is known to make several anti-insectan compounds, beside AF (TePaske  
331 et al. 1992; Cary et al. 2018). Other insect pests that are more tolerant may vector  
332 *A. flavus* (Zeng et al. 2006; Opoku et al. 2019). Spatial correlation analysis of

333 natural infestation by different pests and seed AF content in field-grown maize  
334 plants indicated that AF content was correlated to the frequency of weevils and  
335 stink bug-affected kernels, but not with CEW damage (Ni et al 2011).

336 Our work also showed that FUM is not toxic to *H. zea* (Fig. 4). This may  
337 have allowed CEW to vector *F. verticillioides* and other FUM-contaminating fungi,  
338 as indicated by an increased seed FUM content in infested ears (Fig. 3). CEW  
339 damage is also frequently associated with the colonization by another  
340 mycotoxigenic fungus, *Stenocarpella maydis*, which causes diplodia ear rot  
341 (Munkvold and White 2016). In animal model systems, FB1 at 25-50  $\mu$ M (i.e., 18-  
342 36 ppm) inhibits ceramide synthases and leads to the accumulation of  
343 toxigenic/carcinogenic sphinganine and related compounds (Riley et al., 2001;  
344 Riley and Merrill 2019). Conversely, FB1 was not toxic to yellow mealworm larvae  
345 even at 450 ppm when included in the diet or when injected into larva (Abado-  
346 Becognee et al. 1998). Recently, the brown marmorated stink bug (*Halyomorpha*  
347 *halys*) was shown to enhance *F. verticillioides* infection and FUM contamination  
348 in field corn (Opoku et al. 2019). Among other secondary metabolites produced  
349 by *F. verticillioides*, fusaric acid is only a weak antiseptan compound (Dowd 1988).  
350 The lack of secondary metabolites with potent insecticidal properties in the  
351 biosynthetic repertoire of *F. verticillioides* could be one of the reasons for its  
352 frequently observed transmission via insect infestation (e.g., Smeltzer 1959;  
353 Dowd 2000; Mesterházy et al. 2012; Madege et al. 2018)

354           The association between CEW-infestation and high FUM content can also  
355 be explained by host reaction to fungal infection potentially triggering enhanced  
356 insect damage. Mycotoxin-producing *Fusarium* spp. trigger volatile production  
357 by maize leaves that attract cereal leaf beetles ([Piesik et al. 2011](#)). Other examples  
358 where insect species benefit from the presence of mycotoxigenic fungi are also  
359 reported ([Schulthess et al. 2002](#)). Alternatively, insect-fungus interactions can  
360 enhance production of secondary metabolites by plant host tissues ([Döll et al.](#)  
361 [2013](#); [Drakulic et al. 2015, 2016](#)).

362           Although this study was pursued to explain a serendipitous observation  
363 made during two unrelated field studies, it has important implications in  
364 mycotoxin control. AF and FUM are ubiquitous and unpredictable contaminants  
365 of commodities, particularly maize. Our study clarifies a component of this  
366 unpredictability. The late flowering trait of *A. flavus* resistant lines (owing to their  
367 tropical origin) is known to delay harvest, potentially leading to frost damage  
368 and/or high grain moisture. Our current work shows that delayed flowering  
369 coupled with low AF accumulation can exacerbate CEW infestation, which in turn  
370 can lead to contamination by other mycotoxins, such as fumonisins ([Munkvold](#)  
371 [and White 2016](#)).

372           In contrast to a mutual antagonism reported previously between *A. flavus*  
373 and *F. verticillioides* ([Zummo and Scott 1992](#); also see **Fig. S3**), we observed high  
374 levels of AF and FUM co-contaminating our samples. B73, in particular with its  
375 high susceptibility to both mycotoxigenic fungi, had very high levels of both AF

376 and FUM in many of its seed samples. Although CEW damage was very low in this  
377 inbred (**Fig. 1B and 2**), FUM levels were exacerbated in infested ears (**Fig. 3B**).  
378 There is some evidence for an additive or even synergistic effect on  
379 carcinogenicity from co-exposure to AF and FUM ([World Health Organization](#)  
380 [2018](#)). Based on biomarker studies and food analyses, the co-occurrence of these  
381 two mycotoxins has been widely documented in developing countries ([Shirima et](#)  
382 [al. 2013](#); [Biomin Mycotoxin Survey 2019](#)). It is important to examine the  
383 underlying factors as well as effects of mycotoxin co-contamination both by  
384 researchers and regulatory agencies to mitigate its impact on food safety ([Lopez](#)  
385 [Garcia 1998](#)).

386

387

388 **MATERIALS AND METHODS**

389 **Field planting of maize and application of *A. flavus* toxigenic strains:** The four  
390 maize genotypes used in the study are non-transgenic and non-commercial lines.  
391 The two hybrids, GA209×T173 (susceptible to AF accumulation) and  
392 Mp313E×Mp717 (resistant to AF accumulation), were developed at the USDA-ARS  
393 Corn Host Plant Resistance Research Unit, Mississippi ([Williams and Windham](#)  
394 [2009](#)). The hybrids, along with two popular inbreds B73 (susceptible to AF  
395 accumulation, ([Campbell and White 1995](#)) and CML322 (resistant to AF  
396 accumulation, ([Betrán et al 2002](#))) were planted in 4-row plots at the LSU  
397 Agricultural Experimental Station in Baton Rouge (Louisiana) in the middle of  
398 April. To keep the insect pressure low, Besiege (a broad-spectrum foliar  
399 insecticide with fast knockdown and long-lasting residual effects; has  
400 chlorantraniliprole and  $\lambda$ -cyhalothrin as active ingredients) was sprayed at ~V9  
401 and R1 growth stages. Three days after the second insecticide application, plants  
402 were inoculated with *A. flavus* strains by silk canal injections ([Zummo and Scott](#)  
403 [1992](#)), with conidial suspensions as described before ([Chalivendra et al. 2018](#)).  
404 The hybrids were inoculated with CA14, inbreds with Tox4. Plants were  
405 maintained with standard agronomic practices of fertilizer and herbicide  
406 applications and received irrigations during extended dry periods.

407 The inbred study was originally aimed at analyzing microbiome changes in  
408 a susceptible and a resistant line in response to *A. flavus* colonization. We used  
409 Tox4 in the study because it is an isolate from local maize fields ([Chalivendra et](#)

410 [al. 2018](#)), produces high AF levels and serves as a good model strain to study  
411 microbiome changes. The experiment with hybrids was an extension of recent  
412 studies on biofilm-like structure formation by *A. flavus* during maize seed  
413 colonization ([Dolezal et al. 2013](#); [Shu et al. 2014](#); [Windham et al. 2018](#)). The  
414 objective of our study was to localize the expression of *A. flavus* Medusa A gene  
415 by *in situ* hybridization in maize seeds in relation to the spatial distribution of  
416 the biofilm-like structure. *A. flavus* strain CA14 was used in the study, since it  
417 has whole genome sequence information and needed mutant resources ([Chang  
418 et al. 2019](#)). CA14 was obtained from the USDA Agricultural Research Service  
419 Culture Collection, Northern Regional Research Laboratory, Peoria, IL, USA.

420 **HPLC analysis of aflatoxin B<sub>1</sub>:** One ear per plant from each genotype and  
421 treatment was harvested, resulting in 70-80 ears in inoculated plants and double  
422 the number from uninoculated plants. Ears in each lot were separated by the  
423 presence or absence of CEW infestation to monitor the effect of insect damage  
424 on mycotoxin levels. Only ears with visible internal damage (i.e., nibbled seed and  
425 cut silks, larval feeding tracks with frass; sometimes with dead or live CEW larvae)  
426 were considered as infested. No distinct spatial or other pattern of infestation  
427 was observed in our plots (as was also reported by [Ni et al. 2011](#)), except that a  
428 majority of resistant inbred or hybrid plants were infested, while only a few ears  
429 from susceptible lines showed damage by the earworm. At least three ears were  
430 used per replicate and each category had 3-5 replicates. Given the low frequency  
431 of CEW-damaged ears in B73 and GA209×T173, all ears in each category were  
432 used for AF analysis to have robust AF data. When the seed meal exceeded more

433 than 100 g (in uninoculated controls), we took more than one sample to minimize  
434 sampling error. AF from seed meal was extracted and measured as before  
435 ([Chalivendra et al. 2018](#)) with modified HPLC conditions. The equipment included  
436 Waters e2695 HPLC (Waters Corp., Milford, MA, United States) fitted with a Nova-  
437 Pak C18 column, a photochemical reactor (Aura Industries Inc., New York, United  
438 States) and a Waters 2475 FLR Detector (Waters Corp.). The signal was detected  
439 by excitation at 365 nm and emission at 440 nm. Aqueous methanol (37.5%) was  
440 used as the mobile phase.

441 **LC-MS analysis of fumonisins:** Maize kernel samples were analyzed for FB1, FB2  
442 and FB3 by liquid chromatography–mass spectrometry (LC-MS) using an  
443 adaptation of a previously published method for mycotoxin analysis ([Plattner](#)  
444 [1999](#)). Briefly, maize samples were ground with a laboratory mill. Portions (5 g)  
445 of the seed meal were extracted with 25 mL 1:1 acetonitrile/water for 2 h on a  
446 Model G2 Gyrotory Shaker (New Brunswick Scientific, Edison, NJ, USA). Extracts  
447 were filtered with a Whatman 125 mm 2V paper filter (GE Healthcare Bio-  
448 Sciences, Pittsburgh, PA, USA). A total of 10  $\mu$ L of extract was applied to a Kinetex  
449 (Phenomenex, Torrance, CA, USA) C18 column (50 mm length, 2.1 mm diameter).  
450 Chromatography was conducted utilizing a Thermo Dionex Ultimate 3000  
451 (Thermo Fisher, Waltham, MA, USA) ultrahigh-performance liquid  
452 chromatography (UPLC) system consisting of an autosampler coupled to a binary  
453 gradient pump. Elution of analyte was achieved with a 0.6 mL min<sup>-1</sup> gradient  
454 flow of methanol and water (0.3% acetic acid was added to the mobile phase). The  
455 solvent program used a 35–95% gradient over 5 min. Flow was directed to a Q

456 Exactive (Thermo Fisher, Waltham, MA, USA) hybrid quadrupole-Orbitrap mass  
457 spectrometer equipped with an electrospray ionization source. The mass  
458 spectrometer was operated in full-scan mode over a range of 300 to 1200 m/z.  
459 Operation of the LC-MS and quantification of the eluting fumonisins were  
460 performed utilizing Thermo Xcalibur software. Quantification of fumonisins was  
461 based upon intensity of protonated ions for FB1 (m/z 722.3), FB2 (m/z 706.3)  
462 and FB3 (m/z 706.3) compared to calibration standards of the toxins. The limit  
463 of quantification for the analytical method was determined to be 0.1 µg per g for  
464 FB1, FB2 and FB3.

465

#### 466 **Toxicity bioassays**

467 The toxicity of FUM to CEW larvae was tested in a pre-mixed meridic diet (WARD'S  
468 Stonefly Heliopsis diet, Rochester, NY) containing 0, 3, 10, 30, 60 or 100 µg/g FB1  
469 (Cayman Chemical, MI) or 20, 50, 100, 250 or 500 ng/g of AFB<sub>1</sub> (Sigma Chemicals).  
470 The diet was prepared as per manufacturer's instructions. The FB1 stock, made  
471 in water, was diluted to the above rates before the dry diet was added and mixed  
472 thoroughly. AF was dissolved in methanol at a stock concentration of 2 mg/mL  
473 and diluted appropriately to provide the aforementioned concentrations. The  
474 highest concentration of methanol used (0.08% by w/w) was incorporated into  
475 the control diet. The assay was done in a 128 well bioassay plate (C-D  
476 International Inc., Pitman, NJ). A single CEW neonate from a laboratory CEW  
477 colony obtained from Benzon Research Inc. (Carlisle, PA) was added to each well



478 with 1 g diet using a camel hair brush (Kaur et al. 2019). At least 20 larvae were  
479 tested per treatment and the assay was repeated four times.

#### 480 **Statistical analysis of data**

481 Insect damage and aflatoxin levels were compared by ANOVA and post-hoc  
482 analysis by Tukey's Honestly Significant Difference (HSD) test using R program  
483 (version 3.6.2) in RStudio. Student's t-test was used for comparison of specific  
484 pairs of data sets.

485

486

#### 487 **Safety**

488 Aflatoxin B<sub>1</sub> and fumonisin B<sub>1</sub>, being highly toxic mycotoxins, were handled with  
489 care using a biohood, surgical gloves and nose as well as mouth masks. All  
490 residues and containers were decontaminated using bleach and by autoclaving.

#### 491 **SUPPLEMENTAL MATERIAL**

492 **SUPPLEMENTAL MATERIAL FOR THIS ARTICLE MAY BE FOUND AT:**

493 **ACKNOWLEDGMENTS**

494 SC thanks the National Corn Growers Association for the funding support  
495 through their AMCOE program. Excellent field and laboratory assistance by Mr.  
496 Anthony Nguyen is gratefully acknowledged. Dr. Z-Y Chen is thanked for his help  
497 in aflatoxin measurement.

498 **REFERENCES**

499 Abado-Becognee K, Fleurat-Lessard F, Creppy EE, Melcion D. 1998. Effects of  
500 fumonisin B1 on growth and metabolism of larvae of the yellow mealworm,  
501 *Tenebrio molitor*. *Entomologia Experimentalis et Applicata* 86:135-143.

502 <https://doi.org/10.1046/j.1570-7458.1998.00274.x>

503 Abbas HK, Zablotowicz RM, Weaver MA, Shier WT, Bruns HA, Bellaloui N, Accinelli  
504 C, Abel CA. 2013. Implications of Bt Traits on Mycotoxin Contamination in Maize:

505 Overview and Recent Experimental Results in Southern United States. *Journal of*  
506 *Agricultural and Food Chemistry* 61:11759-11770.

507 <https://doi.org/10.1021/jf400754g>

508 Ako M, Schulthess F, Gumedzoe MYD, Cardwell KF. 2003. The effect of *Fusarium*  
509 *verticillioides* on oviposition behaviour and bionomics of lepidopteran and  
510 coleopteran pests attacking the stem and cobs of maize in West Africa.  
511 *Entomologia Experimentalis et Applicata* 106:201-210.

512 Alborch L, Bragulat MR, Cabañes FJ. 2010. Comparison of two selective culture  
513 media for the detection of *Fusarium* infection in conventional and transgenic  
514 maize kernels. *Letters in Applied Microbiology* 50:270-275.

515 Baird R., Abbas HK, Windham G, Williams P, Baird S, Ma P, Kelley R, Hawkins L,  
516 Scruggs M. 2008. Identification of select fumonisin forming *Fusarium* species  
517 using PCR applications of the polyketide synthase gene and its relationship to  
518 fumonisin production *in vitro*. *International Journal of Molecular Sciences* 9:554-  
519 570.

- 520 Betrán FJ, Isakeit T, Odvody G. 2002. Accumulation of white and  
521 yellow maize inbreds in diallel crosses. *Crop Science* 42:1894-1901.
- 522 BIOMIN World Mycotoxin Survey. 2015
- 523 BIOMIN World Mycotoxin Survey. 2019 Quarter 1
- 524 Blacutt AA, Gold SE, Voss KA, Gao M, Glenn AE. 2018. *Fusarium verticillioides*:  
525 advancements in understanding the toxicity, virulence, and niche adaptations of  
526 a model mycotoxigenic pathogen of maize. *Phytopathology* 108:312-326.
- 527 Bowers E, Hellmich R, Munkvold G. 2014. Comparison of Fumonisin  
528 Contamination Using HPLC and ELISA Methods in Bt and Near-Isogenic Maize  
529 Hybrids Infested with European Corn Borer or Western Bean Cutworm. *Journal*  
530 *of Agricultural and Food Chemistry* 62:6463-6472.
- 531 Boyd ML, Bailey WC. 2001. European Corn Borer: A Multiple-Crop Pest in Missouri.  
532 *Bulletin G7113*. <https://extension2.missouri.edu/g7113>
- 533 Campbell KW, White DG. 1995. Evaluation of corn genotypes for resistance to  
534 *Aspergillus* ear rot, kernel infection and aflatoxin production. *Plant Disease*  
535 79:1039-1045.
- 536 Capinera JL. *Encyclopedia of Entomology*, 2004, Kluwer-Academic, New York.
- 537 Cappelle K. 2018. Fumonisin B1 in Bt and non-Bt maize: A meta-analysis. Iowa  
538 State University Graduate Theses and Dissertations 16324.  
539 <https://doi.org/10.31274/etd-180810-5954>

- 540 Cary JW, Gilbert MK, Lebar MD, Majumdar R, Calvo AM. 2018. *Aspergillus flavus*  
541 secondary metabolites: more than just aflatoxins. Food Safety 6:7-32.
- 542 Chalivendra S, DeRobertis C, Reyes Pineda J, Ham JH, Damann K. 2018. Rice  
543 phyllosphere *Bacillus* species and their secreted metabolites suppress *Aspergillus*  
544 *flavus* growth and aflatoxin production *in vitro* and in maize seeds. Toxins 10:  
545 159.
- 546 Chang P-K, Scharfenstein LL, Mack B, Hua SST. 2019. Genome Sequence of an  
547 *Aspergillus flavus* CA14 Strain That Is Widely Used in Gene Function Studies.  
548 Microbiology Resource Announcements 8:e00837-19.
- 549 Cotty PJ, Jaime-Garcia R. 2007. Influences of climate on aflatoxin producing fungi  
550 and aflatoxin contamination. International Journal of Food Microbiology  
551 119:109-115.
- 552 Dively GP, Venugopal PD, Finkenbinder C. 2016. Field-evolved resistance in corn  
553 earworm to Cry proteins expressed by transgenic sweet corn. PLoS ONE  
554 11:e0169115.
- 555 Dolezal AL, Obrian GR, Nielsen DM, Woloshuk CP, Boston RS, Payne GA. 2013.  
556 Localization, morphology and transcriptional profile of *Aspergillus flavus* during  
557 seed colonization. Mol Plant Pathol 14:898-909. [doi:10.1111/mpp.12056](https://doi.org/10.1111/mpp.12056)
- 558 Döll K, Chatterjee S, Scheu S, Karlovsky P, Rohlf M. 2013. Fungal metabolic  
559 plasticity and sexual development mediate induced resistance to arthropod  
560 fungivory. Proceedings of the Royal Society B: Biological Sciences 280:20131219.

- 561 <http://doi.org/10.1098/rspb.2013.1219>
- 562 Dowd PF. 1988. Toxicological and biochemical interactions of the fungal  
563 metabolites fusaric acid and kojic acid with xenobiotics in *Heliothis zea* (F.) and  
564 *Spodoptera frugiperda* (J.E. Smith). Pesticide Biochemistry and Physiology 32:123-  
565 134.
- 566 Dowd PF. 2000. Indirect Reduction of Ear Molds and Associated Mycotoxins in  
567 *Bacillus thuringiensis* Corn Under Controlled and Open Field Conditions: Utility  
568 and Limitations. Journal of Economic Entomology 93:1669-1679.
- 569 Drakulic J, Ajigboye O, Swarup R, Bruce T, Ray RV. 2016. Aphid Infestation  
570 Increases *Fusarium langsethiae* and T-2 and HT-2 Mycotoxins in Wheat. Appl  
571 Environ Microbiol 82:6548-6556.
- 572 Drakulic J, Caulfield J, Woodcock C, Jones SPT, Linforth R, Bruce TJA, Ray RV.  
573 2015. Sharing a host plant (wheat *Triticum aestivum*) increases the fitness of  
574 *Fusarium graminearum* and the severity of Fusarium head blight but reduces the  
575 fitness of grain aphids (*Sitobion avenae*). Appl Environ Microbiol 81:3492-3501.  
576 [doi:10.1128/AEM.00226-15](https://doi.org/10.1128/AEM.00226-15).
- 577 Guo B, Ji X, Ni X, Fountain JC, Li H et al. 2017. Evaluation of maize inbred lines  
578 for resistance to pre-harvest aflatoxin and fumonisin contamination in the field.  
579 The Crop Journal, 5:259-264.

- 580 Gupta A, Gopal M. 2002. Aflatoxin production by *Aspergillus flavus* isolates  
581 pathogenic to coconut insect pests. World Journal of Microbiology and  
582 Biotechnology 18:329.
- 583 Handley DT. 2018. MAJOR CORN EARWORM FLIGHT THREATENS LATE CORN.  
584 Sweet Corn IPM Newsletter- September 6, No. 11  
585 (<https://extension.umaine.edu/highmoor/blog/tag/pest-management/>).
- 586 Henry WB. 2013. Maize aflatoxin accumulation segregates with early maturing  
587 selections from an S2 breeding cross population. Toxins 5:162-172.
- 588 Henry WB, Williams WP, Windham GL, Hawkins LK. 2009. Evaluation of maize  
589 inbred lines for resistance to *Aspergillus* and *Fusarium* ear rot and mycotoxin  
590 accumulation. Agronomy Journal 101:1219-1226.
- 591 Hung H-Y, Shannon LM, Tian F, Bradbury PJ, Chen C, Flint-Garcia SA, McMullen  
592 MD, Ware D, Buckler ES, Doebley JF, Holland JB. 2012. ZmCCT and the genetic  
593 basis of day-length adaptation underlying the postdomestication spread of  
594 maize. Proceedings of the National Academy of Sciences, 109:E1913-E1921.
- 595 Hutchison WD, Burkness EC, Mitchell PD, Moon RD, Leslie, TW, Fleischer SJ,  
596 Abrahamson M, Hamilton KL, Steffey KL, Gray ME, Hellmich RL, Kaster LV, Hunt  
597 TE, Wright RJ, Pecinovsky K, Rabaey TL, Flood BR, Raun ES. 2010. Areawide  
598 suppression of European Corn Borer with Bt maize reaps savings to non-Bt maize  
599 growers. Science 330:222-225.

- 600 Johnson MW, Stinner RE, Rabb RL. 1975. Ovipositional response of *Heliothis zea*  
601 (Boddie) to its major hosts in North Carolina. *Environmental Entomology* 4:291-  
602 297.
- 603 Kaur G, Guo J, Brown S, Head GP, Price PA., Paula-Moraes S, Ni X, Dimase M, Huang  
604 F. 2019. Field-evolved resistance of *Helicoverpa zea* (Boddie) to transgenic maize  
605 expressing pyramided Cry1A.105/Cry2Ab2 proteins in northeast Louisiana, the  
606 United States. *Journal of Invertebrate Pathology* 163:11-20.
- 607 Kurtz B, Vidal S, Karlovsky P. 2010. Interaction Between Western Corn Rootworm  
608 (Coleoptera: Chrysomelidae) Larvae and Root-Infecting *Fusarium verticillioides*.  
609 *Environmental Entomology* 39:1532-1538.
- 610 Lee LS, Lillehoj EB, Kwolek WF. 1980. Aflatoxin distribution in individual com  
611 kernels from intact ears. *Cereal Chem* 57:340-343
- 612 Lillehoj EB, McMillian WW, Widstrom NW, Guthrie WD, Jarvis JL, Barry D, Kwolek  
613 WF. 1984. Aflatoxin contamination of maize kernels before harvest: Interaction  
614 of *Aspergillus flavus* spores, corn earworm larvae and fungicide applications.  
615 *Mycopathologia* 86:77-81.
- 616 Lopez-garcia R. 1998. Aflatoxin B(1) and Fumonisin B(1) co-contamination:  
617 Interactive effects, possible mechanisms of toxicity, and decontamination  
618 procedures. *LSU Historical Dissertations and Theses*, 6746.
- 619 Madege RR, Audenaert K, Kimanya M, Tiisekwa B, De Meulenaer B, Bekaert B,  
620 Landschoot S, Haesaert G. 2018. Control of *Fusarium verticillioides* (Sacc.)



- 621 Nirenberg and Fumonisin by Using a Combination of Crop Protection Products  
622 and Fertilization. *Toxins* 10:67.
- 623 Mesterházy Á, Lemmens M, Reid LM. 2012. Breeding for resistance to ear rots  
624 caused by *Fusarium* spp. in maize – a review. *Plant Breeding* 131:1-19.
- 625 Mideros SX, Windham GL, Williams WP, Nelson RJ. 2012. Tissue-specific  
626 components of resistance to *Aspergillus* ear rot of maize. *Phytopathology*  
627 102:787-793; [doi:10.1094/PHYTO-12-11-0355](https://doi.org/10.1094/PHYTO-12-11-0355)
- 628 Miller JD. 1994. Epidemiology of *Fusarium* ear diseases of cereals. In *Mycotoxins*  
629 in Grain: Compounds Other Than Aflatoxin. 1st ed.; Miller JD, Trenholm HL Eds.,  
630 Eagan Press, St. Paul, MN, USA., pp. 19-36.
- 631 Morales L, Zila CT, Moreta Mejía DE, Montoya Arbelaez M, Balint-Kurti PJ, Holland  
632 JB, Nelson RJ. 2019. Diverse components of resistance to *Fusarium verticillioides*  
633 infection and fumonisin contamination in four maize recombinant inbred  
634 families. *Toxins* 11:86.
- 635 Munkvold, GP 2003. Epidemiology of *Fusarium* Diseases and their Mycotoxins in  
636 Maize Ears. *European Journal of Plant Pathology*, 109:705-713.
- 637 Munkvold GP, White DG. 2016. *Compendium of corn diseases*. Fourth ed. St. Paul,  
638 Minnesota, USA.
- 639 Ni X, Wilson JP, Buntin GD, Guo B, Krakowsky MD, Lee RD, Cottrell TE, Scully BT,  
640 Huffaker A, Schmelz EA. 2011. Spatial Patterns of Aflatoxin Levels in Relation to  
641 Ear-Feeding Insect Damage in Pre-Harvest Corn. *Toxins* 3:920.

642 Opoku J, Kleczewski NM, Hamby KA, Herbert DA, Malone S, Mehl HL. 2019.  
643 Relationship between invasive Brown Marmorated Stink Bug (*Halyomorpha halys*)  
644 and fumonisin contamination of field corn in the mid-Atlantic U.S. *Plant Disease*  
645 103:1189-1195.

646 Piesik D, Lemńczyk G, Skoczek A, Lamparski R, Bocianowski J, Kotwica K, Delaney  
647 KJ. 2011. Fusarium infection in maize: Volatile induction of infected and  
648 neighboring uninfected plants has the potential to attract a pest cereal leaf  
649 beetle, *Oulema melanopus*. *Journal of Plant Physiology* 168:1534-1542.

650 Plattner RD. 1999. HPLC/MS analysis of Fusarium mycotoxins, fumonisins and  
651 deoxynivalenol. *Natural toxins* 76:365-70.

652 Porter P, Bynum Ed. 2018. Texas Panhandle: Bt Corn - What's Up With All the  
653 Corn Earworms? AgFax July 25  
654 ([https://focusonagriculture.blogspot.com/2018/07/whats-up-with-all-corn-](https://focusonagriculture.blogspot.com/2018/07/whats-up-with-all-corn-earworms-in-bt.html)  
655 [earworms-in-bt.html](https://focusonagriculture.blogspot.com/2018/07/whats-up-with-all-corn-earworms-in-bt.html)).

656 Riley RT & Merrill AH. 2019. Ceramide synthase inhibition by fumonisins: a  
657 perfect storm of perturbed sphingolipid metabolism, signaling and disease.  
658 *Journal of Lipid Research* 60:1183-1189.

659 Riley RT, Enongene E, Voss KA, Norred WP, Meredith FI, Sharma RP, Spitsbergen  
660 J, Williams DE, Carlson DB, Merrill AH Jr. 2001. Sphingolipid perturbations as  
661 mechanisms for fumonisin carcinogenesis. *Environ Health Perspect.* 109 Suppl  
662 2:301-8.

- 663 Santiago R, Cao A, Butrón, A. 2015. Genetic factors involved in fumonisin  
664 accumulation in maize kernels and their implications in maize agronomic  
665 management and breeding. *Toxins*, 7:3267-3296.
- 666 Schulthess F, Cardwell KF, Gounou S. 2002. The effect of endophytic *Fusarium*  
667 *verticillioides* on infestation of two maize varieties by *Lepidopterous* stemborers  
668 and Coleopteran grain feeders. *Phytopathology* 92:120-128.
- 669 Scott GE, Zummo N. 1990. Registration of Mp313E Parental Line of Maize. *Crop*  
670 *Science* 30:1378-1378.
- 671 Shirima CP, Kimanya ME, Kinabo JL, Routledge MN, Srey C, Wild CP, et al. 2013.  
672 Dietary exposure to aflatoxin and fumonisin among Tanzanian children as  
673 determined using biomarkers of exposure. *Mol Nutr Food Res* 57:1874-81.
- 674 Shu X, Livingston DP, Franks RG, Boston RS, Woloshuk CP, Payne GA. 2014.  
675 Tissue-specific gene expression in maize seeds during colonization by  
676 *Aspergillus flavus* and *Fusarium verticillioides*. *Mol Plant Pathol* 16:662-74. doi:  
677 [10.1111/mpp.12224](https://doi.org/10.1111/mpp.12224)
- 678 Smeltzer, D. 1959. Relationship between *Fusarium* ear rot and corn earworm  
679 infestation. *Agronomy Journal* 51:53-55.
- 680 St Leger R.J, Screen SE, Shams-Pirzadeh B. 2000. Lack of host specialization in  
681 *Aspergillus flavus*. *Appl Environ Microbiol* 66:320-324.

- 682 Sun G, Wang S, Hu X, Su J, Zhang Y, Xie Y et al. 2011. Co-contamination of  
683 aflatoxin B1 and fumonisin B1 in food and human dietary exposure in three areas  
684 of China. *Food Additives & Contaminants: Part A*, 28:461-470.
- 685 TePaske MR, Gloer JB, Wicklow DT, Dowd PF. 1992. Aflavarin and  $\beta$ -aflatrem: new  
686 anti-insectan metabolites from the sclerotia of *Aspergillus flavus*. *Journal of*  
687 *Natural Products* 55:1080-1086.
- 688 Widstrom NW. 1992. Aflatoxin in developing maize: Interactions among involved  
689 biota and pertinent econiche factors. in: *Handbook of Applied Mycology Vol. 5,*  
690 *Mycotoxins in Ecological Systems.* Marcel Dekker, Basel, Pp. 59-86.
- 691 Williams WP. 2006. Breeding for resistance to aflatoxin accumulation in maize.  
692 *Mycotoxin Research*, 22:27-32.
- 693 Williams WP, Windham GL. 2009. Diallel analysis of fumonisin accumulation in  
694 maize. *Field crops research*, 114:324-326.
- 695 Williams WP, Windham GL. 2006. Registration of Maize Germplasm Line Mp717  
696 Joint contribution of USDA-ARS and the Mississippi Agricultural and Forestry  
697 Experiment Station. *Miss. Agric. and Forestry Exp. Stn. Journal No. J-10802.*  
698 Registration by CSSA. *Crop Science* 46:1407-1408.
- 699 Windham GL, Williams WP, Mylroie JE, Reid CX, Womack ED. 2018. A Histological  
700 study of *Aspergillus flavus* colonization of wound inoculated maize kernels of  
701 resistant and susceptible maize Hybrids in the field. *Frontiers in microbiology*  
702 9:799-799.

- 703 World Health Organization, Co-exposure of fumonisins with aflatoxins. Food  
704 Safety Digest 2018, WHO/NHM/FOS/RAM/18.3.
- 705 Zeng RSL, Niu G, Wen Z, Schuler MA, Berenbaum MR. 2006. Toxicity of Aflatoxin  
706 B1 to *Helicoverpa zea* and Bioactivation by Cytochrome P450 Monooxygenases.  
707 Journal of Chemical Ecology, 32:1459-1471.
- 708 Zummo N, Scott GE. 1992. Interaction of *Fusarium moniliforme* and *Aspergillus*  
709 *flavus* on Kernel Infection and Aflatoxin Contamination in Maize Ears. Plant  
710 Disease 76:771-773.

1 **FIGURE LEGENDS**

2 **Fig. 1. Rate of corn earworm infestation (left panels) and seed AF content (right**  
3 **panels) in maize lines.** (A) Data is from hybrid plots. Infestation was significantly  
4 dependent on the host genotype with very little difference between control  
5 (mock-inoculated) and CA14-inoculated set. Seed AF content in CA14-inoculated  
6 set and the control were also similar in the resistant hybrid (Mp313E x Mp717).  
7 (B) Data shown is from inbreds. There was a similar negative relationship  
8 between CEW infestation rate and seed AF content as was observed in hybrids.  
9 Infestation was significantly dependent on the host genotype with very little  
10 difference between control (mock-inoculated) and Tox4-inoculated plots except  
11 in the case of CML322. The resistant inbred showed only 30% infestation in Tox4  
12 inoculated set compared to the control. Seed AF levels were significantly higher  
13 in B73 both in control and inoculated ears than those of CML322. Values shown  
14 are average + SE. Significant differences (P value <0.05) between each data set  
15 were tested using an ANOVA (Supplemental Table 1) followed by Tukey's  
16 multiple-comparisons post hoc test (Supplemental Table 2) in R (version 3.6.2).  
17 Means are significantly different if marked by a different letter.

18 **FIG. 2. CEW damage is negatively correlated with seed AF content in maize 20**  
19 **lines.** The infestation and AF data from control and infected ears is combined in  
20 each genotype. Significant differences (P value <0.05) between each data set were  
21 tested using an ANOVA (Supplemental Table 3) followed by Tukey's multiple-  
22 comparisons post hoc test (Supplemental Table 4) in R. Average (+SE) infestation

23 and AF values between *A. flavus* susceptible and resistant lines are highly  
24 significant ( $p < 0.01$ ).

25 **Fig. 3. FUM contamination by native *Fusarium* strains.** (A) Seed fumonisin  
26 content in the four maize lines. (B) Seed FUM content parsed by uninfested (clean)  
27 versus CEW infested ears in each genotype. The values are averages + SE in each  
28 genotype and were not significantly different at 95% confidence level.

29 **Fig. 4. Effect of aflatoxin B<sub>1</sub> and fumonisin B<sub>1</sub> on the growth and mortality of**  
30 ***H. zea* larvae.** Graded doses of AF or FB<sub>1</sub> was tested on CEW growth and mortality  
31 by incorporating them into an artificial insect diet. Larvae were grown in a 128  
32 well bioassay plate for 10 d. Each well had 1 g of feed and a single neonate at the  
33 start of the assay. A representative assay from 4 replicates is shown. In an  
34 additional assay, 100 ppm of FB<sub>1</sub> and 300 ppb of AF were tested. Results were  
35 not different, except for a greater larval mortality at 300 ppb of AF (data not  
36 shown). Scale Bar = 1 cm.

37 **Fig. 5. AF and FB<sub>1</sub> effects on CEW larval mass.** At the end of the bioassay, larvae  
38 were removed from the well killed by chloroform vapors and weighed. Values are  
39 averages + SE of  $\geq 16$  larvae/treatment except at 250 ppb of AF, where mortality  
40 was 30% or greater (dead and dried were seen stuck to the bottom of the well).  
41 The values marked with the same letter are not statistically significant. FB<sub>1</sub> had  
42 no significant effect on larval growth at concentrations tested.

43

44

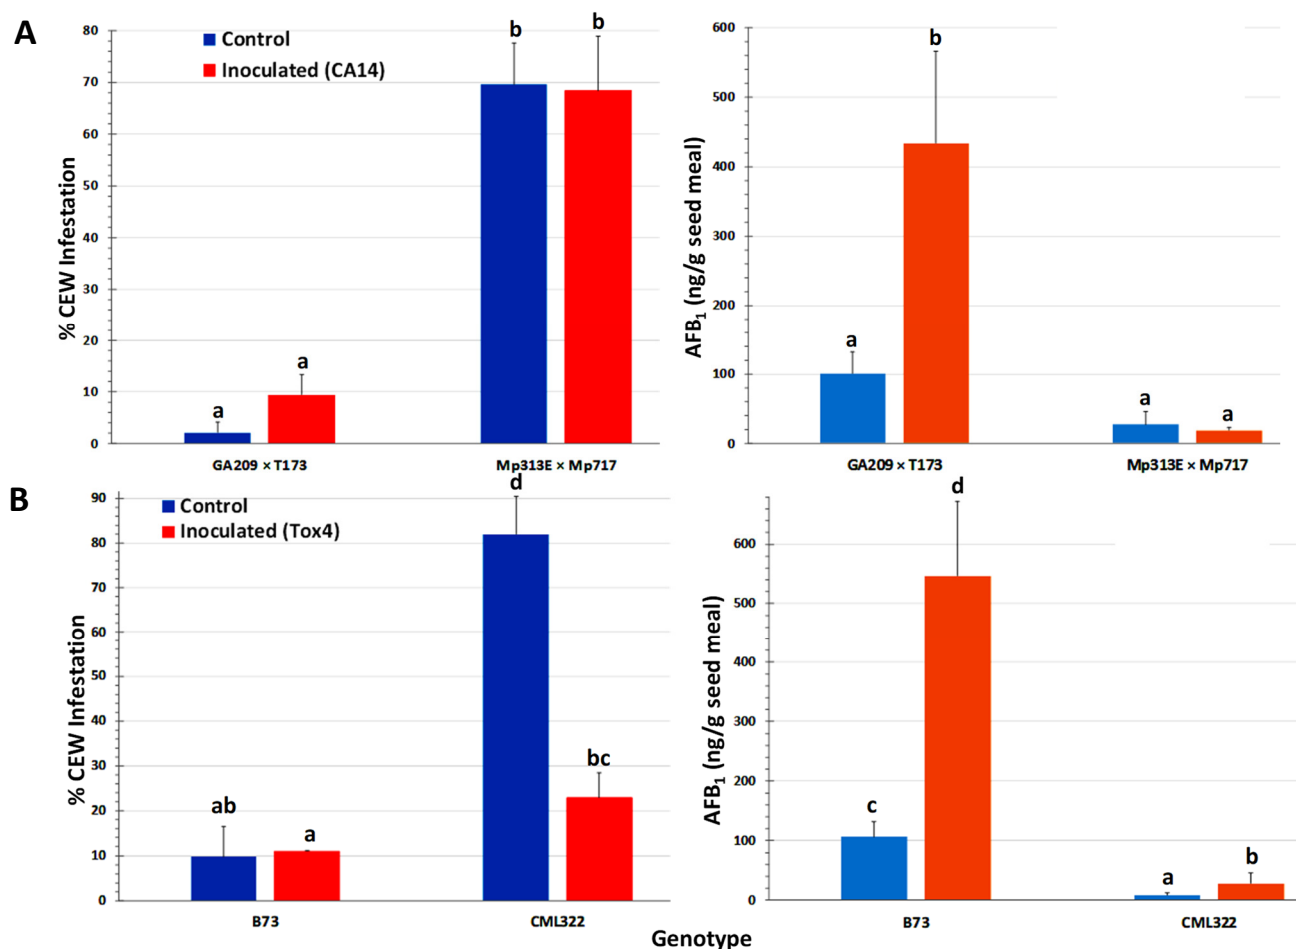

**Fig. 1. Rate of corn earworm infestation (left panels) and seed AF content (right panels) in maize lines.** (A) Data is from hybrid plots. Infestation was significantly dependent on the host genotype with very little difference between control (mock-inoculated) and CA14-inoculated set. Seed AF content in CA14-inoculated set and the control were also similar in the resistant hybrid (Mp313E x Mp717). (B) Data shown is from inbreds. There was a similar negative relationship between CEW infestation rate and seed AF content as was observed in hybrids. Infestation was significantly dependent on the host genotype with very little difference between control (mock-inoculated) and Tox4-inoculated plots except in the case of CML322. The resistant inbred showed only 30% infestation in Tox4



inoculated set compared to the control. Seed AF levels were significantly higher in B73 both in control and inoculated ears than those of CML322. Values shown are average + SE. Significant differences (P value <0.05) between each data set were tested using an ANOVA (Supplemental Table 1) followed by Tukey's multiple-comparisons post hoc test (Supplemental Table 2) in R (version 3.6.2). Means are significantly different if marked by a different letter.

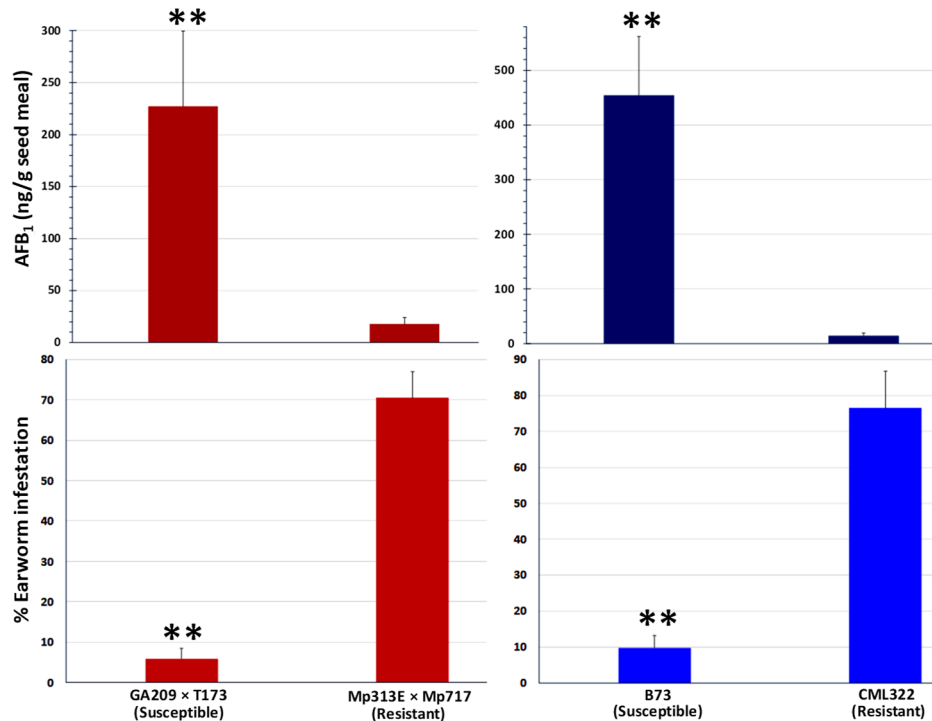

**Fig. 2. CEW damage is negatively correlated with seed AF content in maize lines.** The infestation and AF data from control and infected ears is combined in each genotype. Significant differences (P value <0.05) between each data set were tested using an ANOVA (Supplemental Table 1) followed by Tukey's multiple-comparisons post hoc test (Supplemental Table 2) in R (version 3.6.2). Average (+SE) infestation and AF values between *A. flavus* susceptible and resistant lines are highly significant (p<0.01).

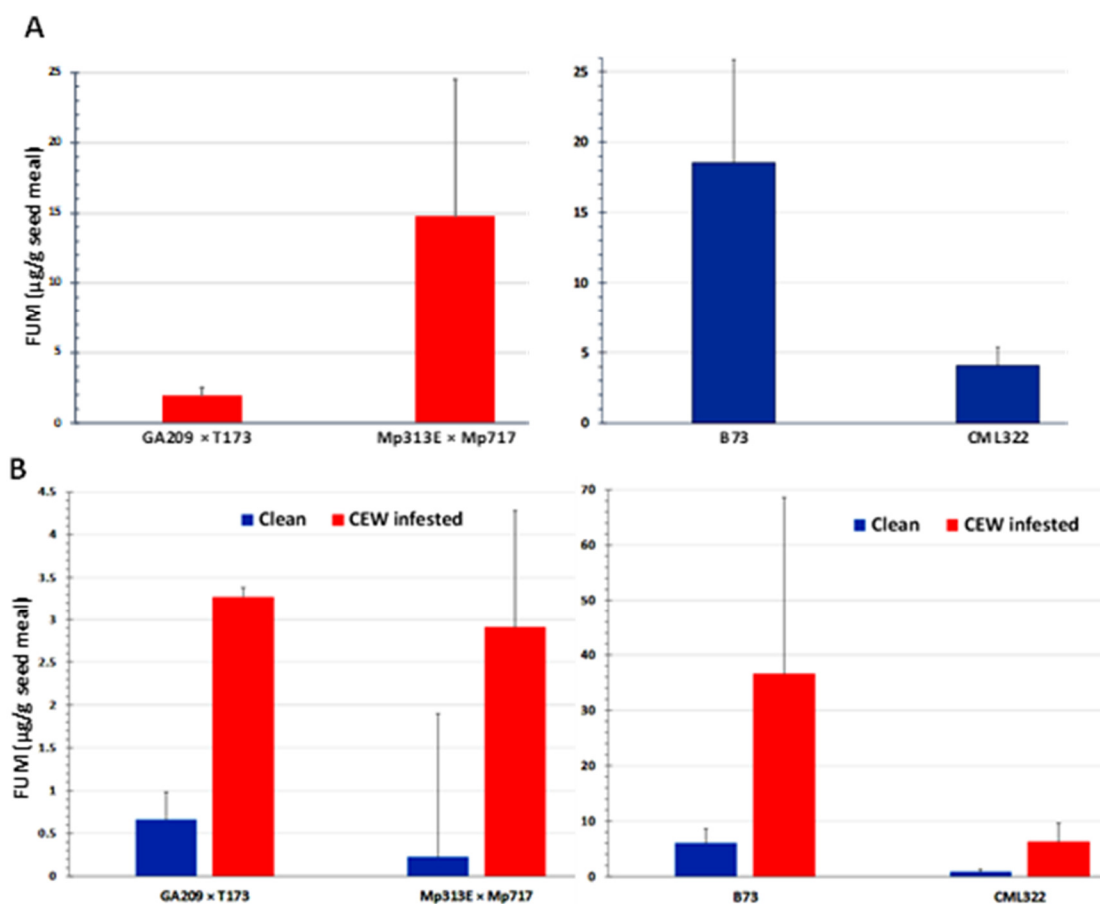

**Fig. 3. FUM contamination by native *Fusarium* strains.** (A) Seed fumonisin content in the four maize lines. (B) Seed FUM content parsed by uninfested (clean) versus CEW infested ears in each genotype. The values are averages + SE in each genotype and were not significantly different at 95% confidence level.

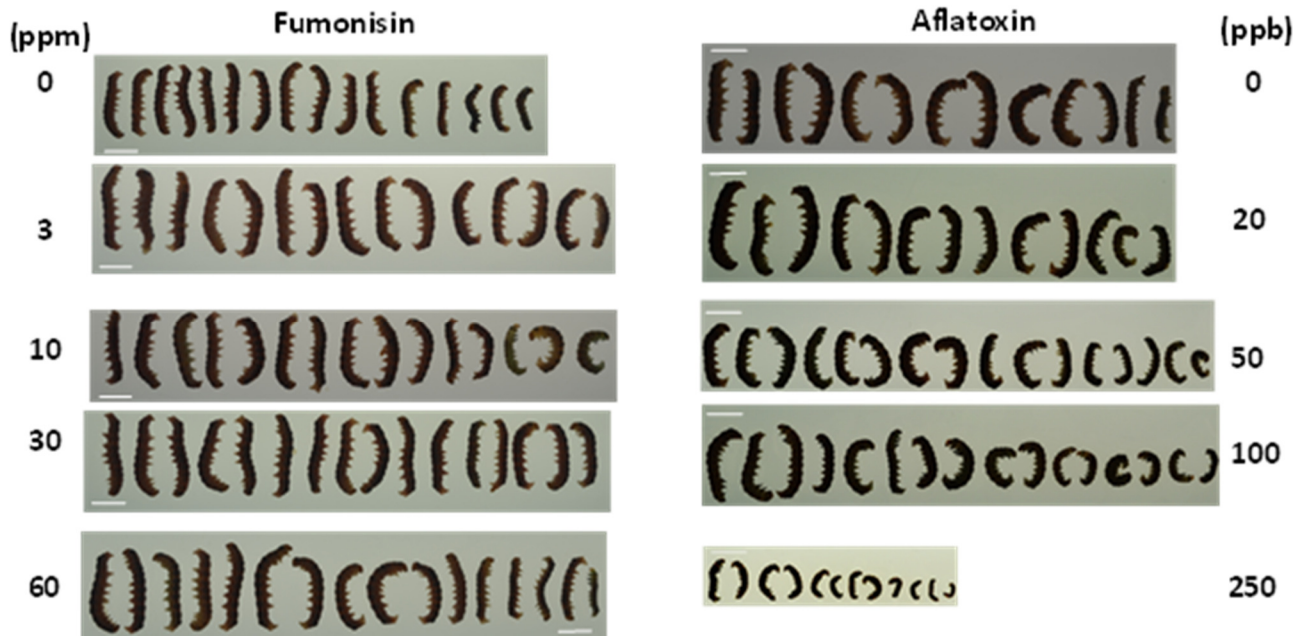

**Fig. 4. Effect of aflatoxin B<sub>1</sub> and fumonisin B<sub>1</sub> on the growth and mortality of *H. zea* larvae.** Graded doses of AF or FB<sub>1</sub> was tested on CEW growth and mortality by incorporating them into an artificial insect diet. Larvae were grown in a 128 well bioassay plate for 10 d. Each well had 1 g of feed and a single neonate at the start of the assay. A representative assay from 4 replicates is shown. In an additional assay, 100 ppm of FB<sub>1</sub> and 300 ppb of AF were tested. Results were not different, except for a greater larval mortality at 300 ppb of AF (data not shown). Scale Bar = 1 cm.

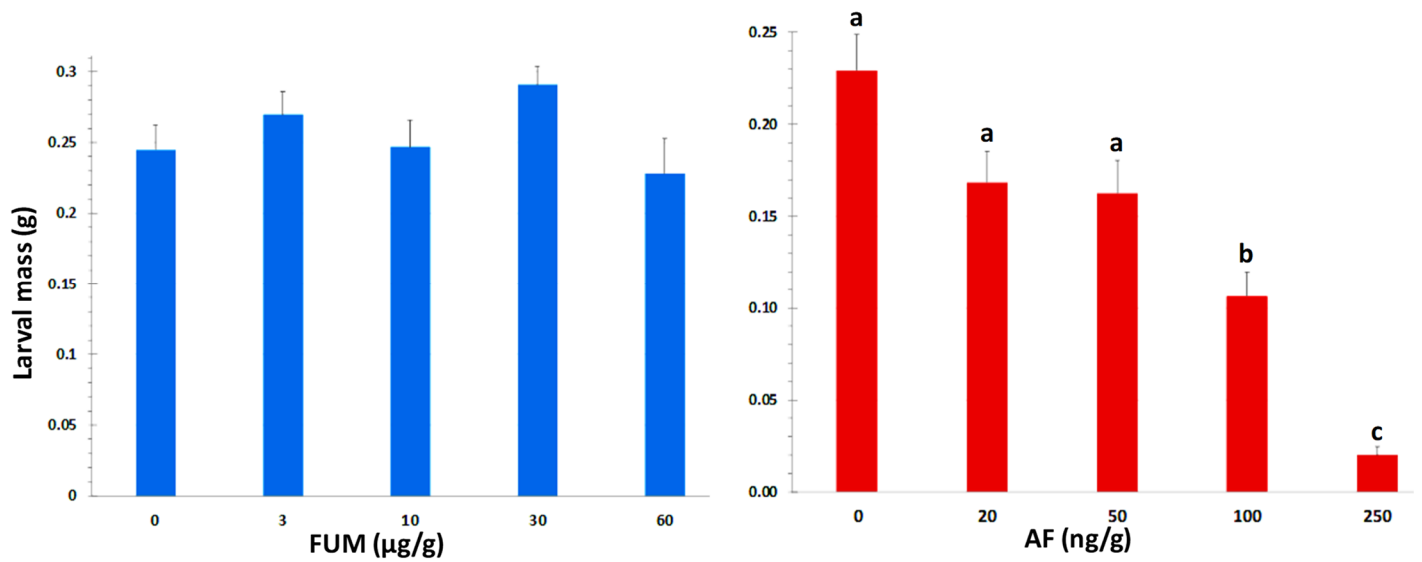

**Fig. 5. AF and FB<sub>1</sub> effects on CEW larval mass.** At the end of the bioassay, larvae were removed from the well killed by chloroform vapors and weighed. Values are averages + SE of  $\geq 16$  larvae/treatment except at 250 ppb of AF, where mortality was 30% or greater (dead and dried were seen stuck to the bottom of the well). The values marked with the same letter are not statistically significant. FB<sub>1</sub> had no significant effect on larval growth at concentrations tested.

## Supplemental data

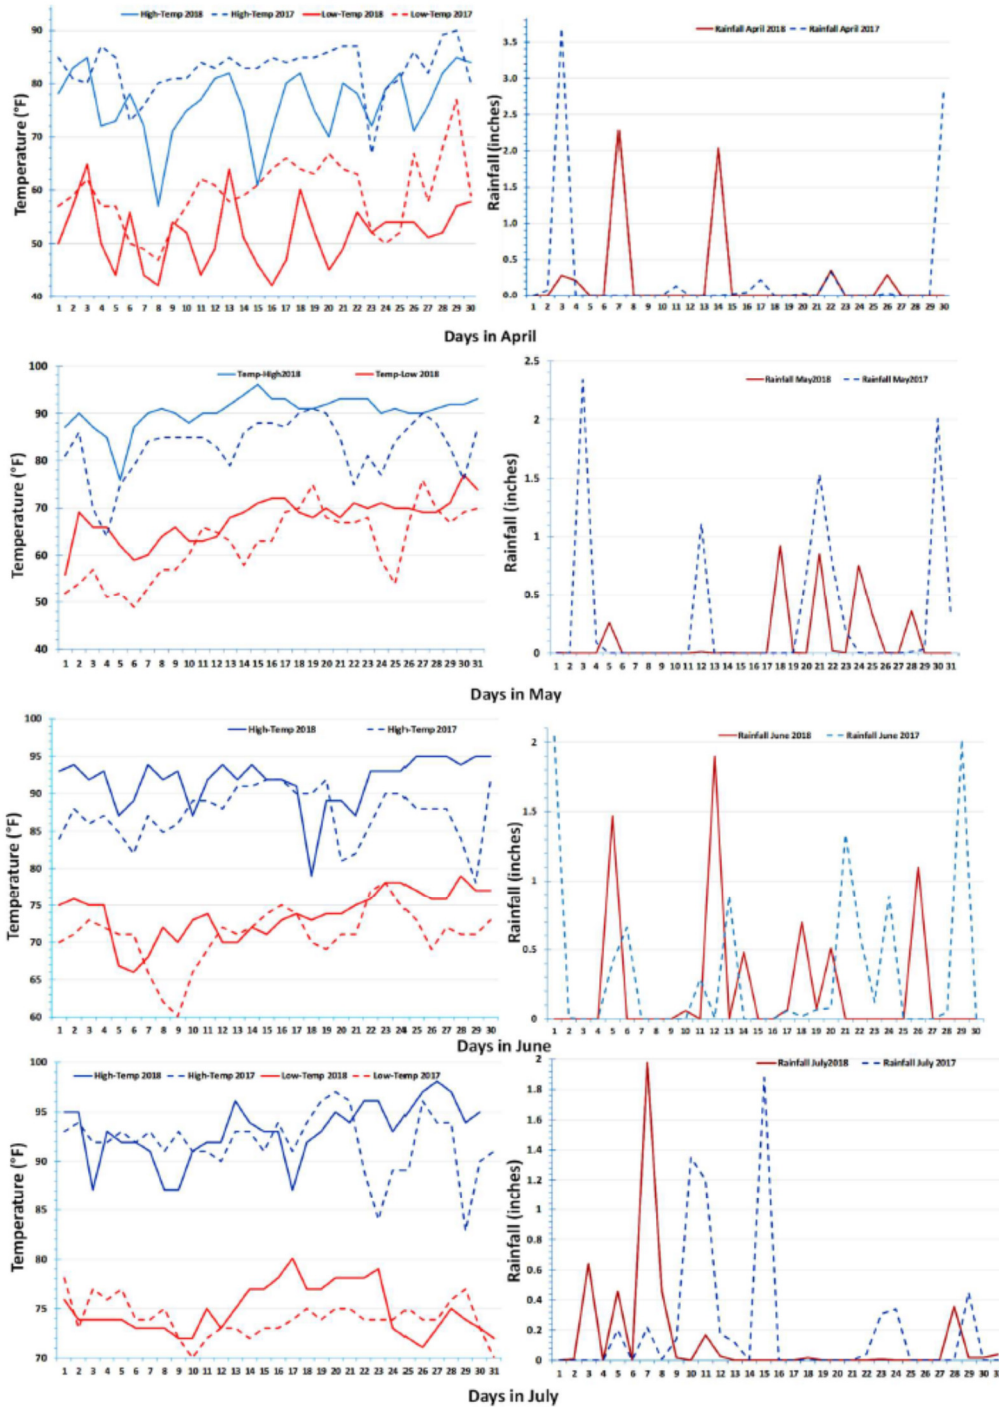

**Figure S1.** Weather data for the months of April-July in 2018 (solid lines) and 2017 (dashed lines). Daily high (blue lines) and low (red lines) temperatures are shown in the left panel. Rain fall is shown in the right panel.

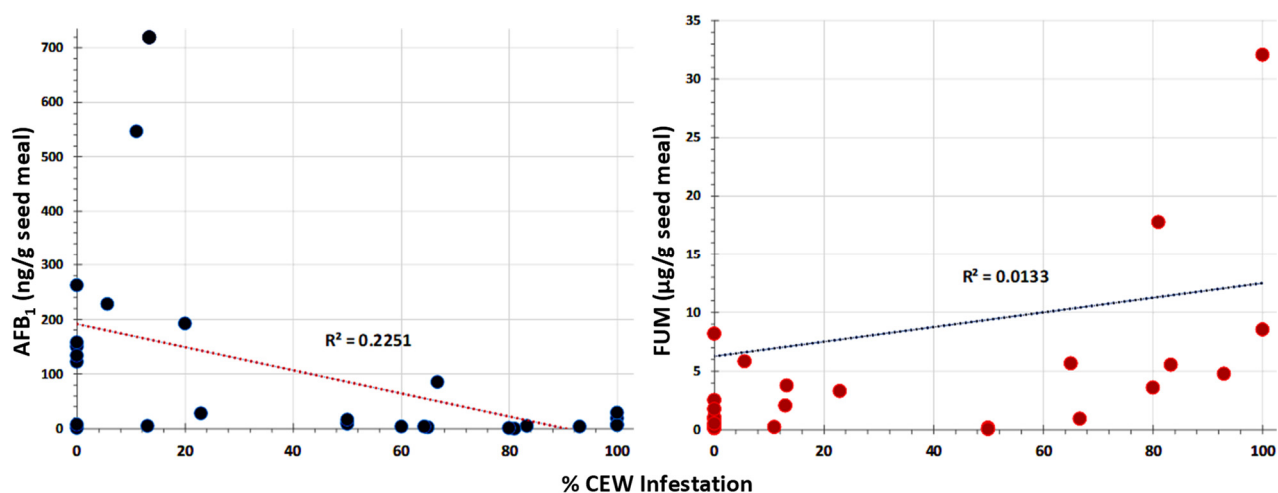

**Fig. S2. Correlation between CEW infestation of ears and seed AF or FUM levels in maize.** Combined data from inbred and hybrid maize lines is plotted. CEW showed a negative relationship with AF and a positive trend with FUM. The greater correlation observed with AF (Pearson correlation coefficient,  $R = -0.47$ ) was likely because of manual inoculation with specific strains of *A. flavus* (dominant to native strains), whereas more random infestation by native *Fusarium* strains may have led to poor correlation ( $R = 0.115$ ).



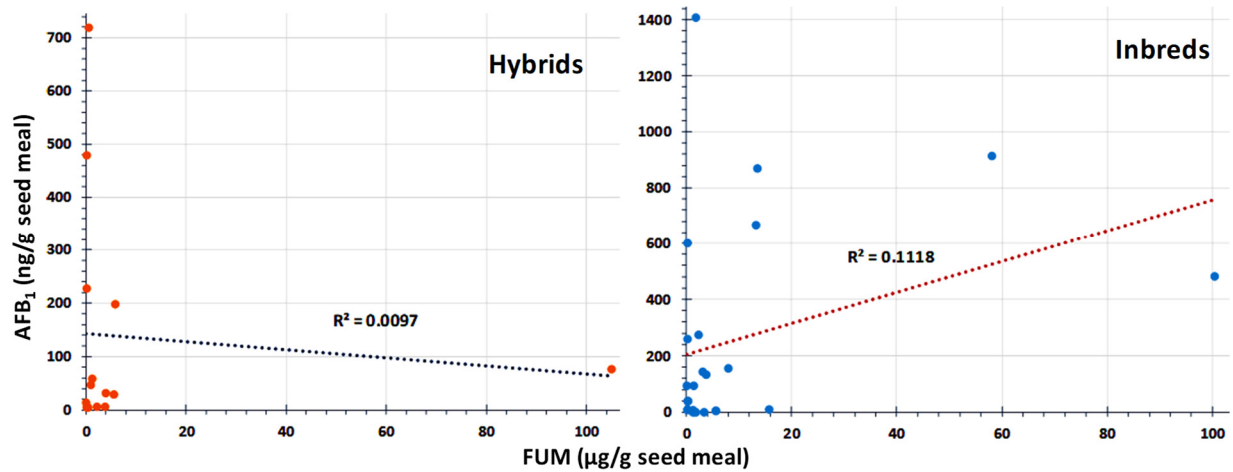

**Fig. S3.** Correlation of Seed FUM and AF contents in hybrids and inbreds. Contents of the two mycotoxins from the same seed sample are poorly correlated in both sets as indicated by Pearson correlation coefficient values ( $r = -0.0983$  for hybrids and  $0.3344$  for inbreds). This lack of correlation indicated that there was no mutual effect in the production of the two mycotoxins by the fungi infecting seeds from same ears.

**Table S1. Analysis of variance for CEW infestation in maize inbreds and hybrids with differential resistance to aspergillus ear rot.**

|                                  | <b>Df</b> | <b>Sum Sq</b> | <b>Mean Sq</b> | <b>F value</b> | <b>Pr(&gt;F)</b> |
|----------------------------------|-----------|---------------|----------------|----------------|------------------|
| <b>Infection</b>                 | 1         | 693           | 693            | 1.595          | 0.225            |
| <b>Genotype</b>                  | 3         | 20828         | 6943           | 15.970         | 4.54e-05 ***     |
| <b>Inoculation<br/>:Genotype</b> | 3         | 321           | 107            | 0.246          | 0.863            |
| <b>Residuals</b>                 | 16        | 6956          | 435            |                |                  |

---

Signif. codes: 0 '\*\*\*' 0.001 '\*\*'

**Table S2. Tukey HSD for Infestation data**

> TukeyHSD(fm)

Tukey multiple comparisons of means

95% family-wise confidence level

Fit: aov(formula = Infestation ~ Infection

data = ANOVA\_infestation

**\$Infection**

diff lwr

uninfected-Infected -10.75 -28.79485 7.29

n + Genotype + Infection on:Genotype + Genotype:Infection, d

upr

p adj

4852 0.224718

**\$Genotype**

diff lwr

SusHybrid-ResHybrid -68.266667 -102.70743

upr p adj

-33.82590 0.0001845

SusInbred-ResInbred -46.500000 -80.94076

-12.05924 0.0067744

**\$`Infection:Genotype`**

diff lwr

upr

p adj

uninfected:ResHybrid-Infected:ResHybrid

-82.14037 47.34037 0.9964093

Infected:SusHybrid-Infected:ResHybrid

-198.673707 -10.9263 0.0146146

uninfected:SusHybrid-Infected:ResHybrid

-215.473707 -19.3263 0.0055849

Infected:SusHybrid-uninfected:ResHybrid

-175.473707 0.673702 0.0538366

uninfected:SusHybrid-uninfected:ResHybrid

-192.273707 -7.7263 0.0210435

uninfected:ResInbred-Infected:ResInbred

-102.273707 37.2737 0.8962415

Infected:SusInbred-Infected:ResInbred

-172.273707 2.273702 0.0640846

uninfected:SusInbred-Infected:ResInbred

-174.94037 0.940369 0.0554305

Infected:SusInbred-uninfected:ResInbred

-128.94037 23.94037 0.4787105

uninfected:SusInbred-uninfected:ResInbred

-131.607033 22.60704 0.4352576

uninfected:SusHybrid-Infected:SusHybrid

-75.74037 50.54037 0.9995344

uninfected:SusInbred-Infected:SusInbred

-61.607033 57.60704 1

Infected:SusInbred-Infected:ResInbred

-177.819737 9 -38.6221 0.0000303

uninfected:SusInbred-Infected:ResInbred

-180.48641 3 -39.9554 0.0000241

Infected:SusInbred-uninfected:ResInbred

-204.858497 9 -52.1414 0.0000033

uninfected:SusInbred-uninfected:ResInbred

-207.52517 3 -53.4748 0.0000027

uninfected:SusHybrid-Infected:SusHybrid

-50.32517 3 25.1251 0.9851455

uninfected:SusInbred-Infected:SusInbred

-36.191833 6 32.1918 0.9999999

**Table S3. Analysis of variance for seed aflatoxin content in maize inbreds and hybrids with differential resistance to aspergillus ear rot.**

|                                          | <b>Df</b> | <b>Sum Sq</b> | <b>Mean Sq</b> | <b>F value</b> | <b>Pr(&gt;F)</b> |     |
|------------------------------------------|-----------|---------------|----------------|----------------|------------------|-----|
| <b>Genotype</b>                          | 3         | 3623512       | 1207837        | 34.373         | 3.99e-10         | *** |
| <b>Infection</b>                         | 1         | 726043        | 726043         | 20.662         | 7.41e-05         | *** |
| <b>Infestation</b>                       | 1         | 308549        | 308549         | 8.781          | 0.005705         | **  |
| <b>Genotype:Inoculation</b>              | 3         | 765751        | 255250         | 7.264          | 0.000753         | *** |
| <b>Genotype:Infestation</b>              | 3         | 423363        | 141121         | 4.016          | 0.015605         | *   |
| <b>Inoculation:Infestation</b>           | 1         | 1979          | 1979           | 0.056          | 0.813916         |     |
| <b>Genotype:Inoculation :Infestation</b> | 3         | 125570        | 41857          | 1.191          | 0.328698         |     |
| <b>Residuals</b>                         | 32        | 1124456       | 35139          |                |                  |     |

---

Signif. codes: 0 '\*\*\*' 0.001 '\*\*' 0.01 '\*' 0.05 '.'

#### Table S4. Tukey's HSD for AF data

##### \$Genotype

| diff                | lwr        | upr       | p adj              |
|---------------------|------------|-----------|--------------------|
| ResInbred-ResHybrid | -3.009286  | -210.3515 | 204.3329 0.9999777 |
| SusHybrid-ResHybrid | 313.154609 | 105.8124  | 520.4968 0.0014703 |
| SusInbred-ResHybrid | 664.271320 | 456.9291  | 871.6135 0.0000000 |
| SusHybrid-ResInbred | 316.163895 | 108.8217  | 523.5061 0.0013187 |
| SusInbred-ResInbred | 667.280606 | 459.9384  | 874.6228 0.0000000 |
| SusInbred-SusHybrid | 351.116711 | 143.7745  | 558.4589 0.0003654 |

##### \$Infection

| diff             | lwr      | upr      | p adj             |
|------------------|----------|----------|-------------------|
| Infected-Control | 245.9747 | 135.7491 | 356.2003 7.41e-05 |

##### \$Infestation

| diff                | lwr      | upr      | p adj              |
|---------------------|----------|----------|--------------------|
| Uninfested-Infested | 160.3508 | 50.12523 | 270.5765 0.0057046 |

##### \$`Genotype:Infection`

| diff                                  | lwr          | upr        | p adj             |
|---------------------------------------|--------------|------------|-------------------|
| SusHybrid:Control-ResHybrid:Control   | 108.9676382  | -241.61198 | 459.5473 0.970012 |
| ResHybrid:Infected-ResHybrid:Control  | -13.3826243  | -363.96224 | 337.197 1         |
| SusHybrid:Infected-ResHybrid:Control  | 503.9589558  | 153.37934  | 854.5386 0.001249 |
| SusInbred:Control-ResInbred:Control   | 384.7115015  | 34.13189   | 735.2911 0.023423 |
| ResHybrid:Infected-ResInbred:Control  | 5.6059339    | -344.97368 | 356.1856 1        |
| ResInbred:Infected-ResInbred:Control  | 18.5759208   | -332.00369 | 369.1555 1        |
| SusInbred:Infected-ResInbred:Control  | 968.4256307  | 617.84602  | 1319.005 0        |
| ResHybrid:Infected-SusHybrid:Control  | -122.3502624 | -472.92988 | 228.2294 0.944971 |
| SusHybrid:Infected-SusHybrid:Control  | 394.9913176  | 44.41170   | 745.5709 0.018472 |
| ResInbred:Infected-SusInbred:Control  | -366.1355806 | -716.71519 | -15.556 0.035609  |
| SusInbred:Infected-SusInbred:Control  | 583.7141292  | 233.13452  | 934.2937 0.000156 |
| SusHybrid:Infected-ResHybrid:Infected | 517.3415800  | 166.76197  | 867.9212 0.000884 |
| SusInbred:Infected-ResInbred:Infected | 949.8497099  | 599.27010  | 1300.429 0        |

##### \$`Genotype:Infestation`

| diff                                    | lwr          | upr    | p adj                    |
|-----------------------------------------|--------------|--------|--------------------------|
| SusHybrid:Infested-ResHybrid:Infested   | 211.6737740  | -138.9 | 0584 562.75339 0.5252719 |
| ResHybrid:Uninfested-ResHybrid:Infested | -11.1046741  | -361.6 | 8429 339.7494 1.0000000  |
| SusHybrid:Uninfested-ResHybrid:Infested | 403.5307702  | 52.9   | 5116 754.11038 0.0151219 |
| SusInbred:Infested-ResInbred:Infested   | 442.6270845  | 92.0   | 4747 793.10670 0.0058831 |
| ResInbred:Uninfested-ResInbred:Infested | 5.6720109    | -344.9 | 0760 356.75162 1.0000000 |
| SusInbred:Uninfested-ResInbred:Infested | 897.6061377  | 547.0  | 2652 1248.8575 0.0000000 |
| ResHybrid:Uninfested-SusHybrid:Infested | -222.7784480 | -573.3 | 5806 127.10117 0.4613626 |
| SusHybrid:Uninfested-SusHybrid:Infested | 191.8569962  | -158.7 | 2262 542.73661 0.6418312 |
| ResInbred:Uninfested-SusInbred:Infested | -436.9550736 | -787.5 | 3469 -86.37546 0.0067638 |
| SusInbred:Uninfested-SusInbred:Infested | 454.9790532  | 104.3  | 9944 805.75867 0.0043306 |

|                                           |             |       |      |       |      |           |
|-------------------------------------------|-------------|-------|------|-------|------|-----------|
| SusHybrid:Uninfested-ResHybrid:Uninfested | 414.6354442 | 64.0  | 5583 | 765.1 | 1506 | 0.0116165 |
| SusInbred:Uninfested-ResInbred:Uninfested | 891.9341268 | 541.3 | 5451 | 1242. | 1374 | 0.0000001 |

**\$`Infection:Infestation`**

| diff                                   | lwr       | upr        | p adj |         |     |        |
|----------------------------------------|-----------|------------|-------|---------|-----|--------|
| Infested:Infested-Control:Infested     | 258.81725 | 51.47506   | 4     | 66.1594 | 0.0 | 98206  |
| Control:Uninfested-Control:Infested    | 173.19341 | -34.14878  | 3     | 80.5356 | 0.0 | 282735 |
| Infested:Uninfested-Control:Infested   | 406.32553 | 198.98334  | 6     | 13.6677 | 0.0 | 461    |
| Control:Uninfested-Infested:Infested   | -85.62384 | -292.96603 | 1     | 21.7184 | 0.0 | 807700 |
| Infested:Uninfested-Infested:Infested  | 147.50828 | -59.83391  | 3     | 54.8505 | 0.0 | 370108 |
| Infested:Uninfested-Control:Uninfested | 233.13212 | 25.78993   | 4     | 40.4743 | 0.0 | 227130 |

**\$`Genotype:Infection:Infestation`**

|                                                           | diff     | lwr        | upr        |
|-----------------------------------------------------------|----------|------------|------------|
| SusHybrid:Control:Infested-ResHybrid:Control:Infested     | 34.26629 | -533.27882 | 601.81140  |
| ResHybrid:Infested:Infested-ResHybrid:Control:Infested    | -43.6601 | -611.20516 | 523.88506  |
| SusHybrid:Infested:Infested-ResHybrid:Control:Infested    | 345.4212 | -222.12391 | 912.96631  |
| ResHybrid:Control:Uninfested-ResHybrid:Control:Infested   | -41.3821 | -608.92721 | 526.16301  |
| SusHybrid:Control:Uninfested-ResHybrid:Control:Infested   | 142.2869 | -425.25823 | 709.83199  |
| ResHybrid:Infested:Uninfested-ResHybrid:Control:Infested  | -24.4873 | -592.03241 | 543.05781  |
| SusHybrid:Infested:Uninfested-ResHybrid:Control:Infested  | 621.1146 | 53.56949   | 1188.65972 |
| SusInbred:Control:Infested-ResInbred:Control:Infested     | 57.88487 | -509.66025 | 625.42998  |
| ResInbred:Infested:Infested-ResInbred:Control:Infested    | -0.85515 | -568.40026 | 566.68997  |
| SusInbred:Infested:Infested-ResInbred:Control:Infested    | 826.5142 | 258.96905  | 1394.05927 |
| ResInbred:Control:Uninfested-ResInbred:Control:Infested   | -13.7591 | -581.30417 | 553.78606  |
| SusInbred:Control:Uninfested-ResInbred:Control:Infested   | 697.7791 | 130.23397  | 1265.32419 |
| ResInbred:Infested:Uninfested-ResInbred:Control:Infested  | 24.24793 | -543.29718 | 591.79304  |
| SusInbred:Infested:Uninfested-ResInbred:Control:Infested  | 96.57805 | 529.03294  | 1664.12316 |
| ResHybrid:Infested:Infested-SusHybrid:Control:Infested    | -77.9263 | -645.47146 | 489.61877  |
| SusHybrid:Infested:Infested-SusHybrid:Control:Infested    | 311.1549 | -256.39020 | 878.70002  |
| ResHybrid:Control:Uninfested-SusHybrid:Control:Infested   | -75.6484 | -643.19351 | 491.89672  |
| SusHybrid:Control:Uninfested-SusHybrid:Control:Infested   | 108.0206 | -459.52452 | 675.56570  |
| ResHybrid:Infested:Uninfested-SusHybrid:Control:Infested  | -58.7536 | -626.29870 | 508.79152  |
| SusHybrid:Infested:Uninfested-SusHybrid:Control:Infested  | 586.8483 | 19.30320   | 1154.39343 |
| ResInbred:Infested:Infested-SusInbred:Control:Infested    | -58.74   | -626.28512 | 508.80510  |
| SusInbred:Infested:Infested-SusInbred:Control:Infested    | 768.6293 | 201.08418  | 1336.17440 |
| ResInbred:Control:Uninfested-SusInbred:Control:Infested   | -71.6439 | -639.18903 | 495.90119  |
| SusInbred:Control:Uninfested-SusInbred:Control:Infested   | 639.8942 | 72.34910   | 1207.43933 |
| ResInbred:Infested:Uninfested-SusInbred:Control:Infested  | -33.6369 | -601.18205 | 533.90818  |
| SusInbred:Infested:Uninfested-SusInbred:Control:Infested  | 38.69318 | 471.14807  | 1606.23829 |
| SusHybrid:Infested:Infested-ResHybrid:Infested:Infested   | 389.0813 | -178.46386 | 956.62637  |
| ResHybrid:Control:Uninfested-ResHybrid:Infested:Infested  | 2.27795  | -565.26716 | 569.82306  |
| SusHybrid:Control:Uninfested-ResHybrid:Infested:Infested  | 185.9469 | -381.59818 | 753.49205  |
| ResHybrid:Infested:Uninfested-ResHybrid:Infested:Infested | 19.17276 | -548.37236 | 586.71787  |
| SusHybrid:Infested:Uninfested-ResHybrid:Infested:Infested | 664.7747 | 97.22955   | 1232.31977 |
| SusInbred:Infested:Infested-ResInbred:Infested:Infested   | 827.3693 | 259.82419  | 1394.91441 |
| ResInbred:Control:Uninfested-ResInbred:Infested:Infested  | -12.9039 | -580.44902 | 554.64120  |

|                                                             |            |            |            |
|-------------------------------------------------------------|------------|------------|------------|
| SusInbred:Control:Uninfested-ResInbred:Infected:Infested    | 698.6342   | 131.08912  | 1266.17934 |
| ResInbred:Infected:Uninfested-ResInbred:Infected:Infested   | 25.10308   | -542.44203 | 592.64819  |
| SusInbred:Infected:Uninfested-ResInbred:Infected:Infested   | 1 97.43319 | 529.88808  | 1664.97831 |
| ResHybrid:Control:Uninfested-SusHybrid:Infected:Infested    | - 386.8033 | -954.34842 | 180.74181  |
| SusHybrid:Control:Uninfested-SusHybrid:Infected:Infested    | - 203.1343 | -770.67943 | 364.41079  |
| ResHybrid:Infected:Uninfested-SusHybrid:Infected:Infested   | - 369.9085 | -937.45361 | 197.63661  |
| SusHybrid:Infected:Uninfested-SusHybrid:Infected:Infested   | 275.6934   | -291.85171 | 843.23852  |
| ResInbred:Control:Uninfested-SusInbred:Infected:Infested    | - 840.2732 | -1680.55   |            |
| SusInbred:Control:Uninfested-SusInbred:Infected:Infested    | - 128.7351 | -696.28019 | 438.81004  |
| ResInbred:Infected:Uninfested-SusInbred:Infected:Infested   | - 802.2662 | -1604.53   |            |
| SusInbred:Infected:Uninfested-SusInbred:Infected:Infested   | 270.0639   | -297.48122 | 837.60900  |
| SusHybrid:Control:Uninfested-ResHybrid:Control:Uninfested   | 183.669    | -383.87613 | 751.21410  |
| ResHybrid:Infected:Uninfested-ResHybrid:Control:Uninfested  | 16.8948    | -550.65031 | 584.43992  |
| SusHybrid:Infected:Uninfested-ResHybrid:Control:Uninfested  | 662.4967   | 94.95160   | 1230.04182 |
| SusInbred:Control:Uninfested-ResInbred:Control:Uninfested   | 711.5381   | 143.99303  | 1279.08325 |
| ResInbred:Infected:Uninfested-ResInbred:Control:Uninfested  | 38.00699   | -529.53812 | 605.55210  |
| SusInbred:Infected:Uninfested-ResInbred:Control:Uninfested  | 1 110.3371 | 542.79199  | 1677.88222 |
| ResHybrid:Infected:Uninfested-SusHybrid:Control:Uninfested  | - 166.7742 | -734.31929 | 400.77093  |
| SusHybrid:Infected:Uninfested-SusHybrid:Control:Uninfested  | 478.8277   | -88.71739  | 1046.37284 |
| ResInbred:Infected:Uninfested-SusInbred:Control:Uninfested  | - 673.5311 | -1347.06   |            |
| SusInbred:Infected:Uninfested-SusInbred:Control:Uninfested  | 398.799    | -168.74614 | 966.34408  |
| SusHybrid:Infected:Uninfested-ResHybrid:Infected:Uninfested | 645.6019   | 78.05679   | 1213.14702 |
| SusInbred:Infected:Uninfested-ResInbred:Infected:Uninfested | 1 72.33012 | 504.78500  | 1639.87523 |

p adj

|                                                          |   |          |
|----------------------------------------------------------|---|----------|
| SusHybrid:Control:Infested-ResHybrid:Control:Infested    | 1 | 0        |
| ResHybrid:Infected:Infested-ResHybrid:Control:Infested   | 1 | 0        |
| SusHybrid:Infected:Infested-ResHybrid:Control:Infested   | 0 | 0.65447  |
| ResHybrid:Control:Uninfested-ResHybrid:Control:Infested  | 1 | 0        |
| SusHybrid:Control:Uninfested-ResHybrid:Control:Infested  | 0 | 0.999818 |
| ResHybrid:Infected:Uninfested-ResHybrid:Control:Infested | 1 | 0        |
| SusHybrid:Infected:Uninfested-ResHybrid:Control:Infested | 0 | 0.021302 |
| SusInbred:Control:Infested-ResInbred:Control:Infested    | 1 | 0        |
| ResInbred:Infected:Infested-ResInbred:Control:Infested   | 1 | 0        |
| SusInbred:Infected:Infested-ResInbred:Control:Infested   | 0 | 0.000575 |
| ResInbred:Control:Uninfested-ResInbred:Control:Infested  | 1 | 0        |
| SusInbred:Control:Uninfested-ResInbred:Control:Infested  | 0 | 0.005792 |
| ResInbred:Infected:Uninfested-ResInbred:Control:Infested | 1 | 0        |
| SusInbred:Infected:Uninfested-ResInbred:Control:Infested | 0 | 4.1E-06  |
| ResHybrid:Infected:Infested-SusHybrid:Control:Infested   | 0 | 1        |
| SusHybrid:Infected:Infested-SusHybrid:Control:Infested   | 0 | 0.790392 |
| ResHybrid:Control:Uninfested-SusHybrid:Control:Infested  | 1 | 0        |
| SusHybrid:Control:Uninfested-SusHybrid:Control:Infested  | 0 | 0.999994 |
| ResHybrid:Infected:Uninfested-SusHybrid:Control:Infested | 1 | 0        |
| SusHybrid:Infected:Uninfested-SusHybrid:Control:Infested | 0 | 0.037011 |
| ResInbred:Infected:Infested-SusInbred:Control:Infested   | 1 | 0        |
| SusInbred:Infected:Infested-SusInbred:Control:Infested   | 0 | 0.001645 |
| ResInbred:Control:Uninfested-SusInbred:Control:Infested  | 1 | 0        |

|                                                             |   |          |
|-------------------------------------------------------------|---|----------|
| SusInbred:Control:Uninfested-SusInbred:Control:Infested     | 0 | 0.015601 |
| ResInbred:Infested:Uninfested-SusInbred:Control:Infested    | 1 | 0        |
| SusInbred:Infested:Uninfested-SusInbred:Control:Infested    | 0 | 1.17E-05 |
| SusHybrid:Infested:Infested-ResHybrid:Infested:Infested     | 0 | 0.468305 |
| ResHybrid:Control:Uninfested-ResHybrid:Infested:Infested    | 1 | 0        |
| SusHybrid:Control:Uninfested-ResHybrid:Infested:Infested    | 0 | 0.996433 |
| ResHybrid:Infested:Uninfested-ResHybrid:Infested:Infested   | 1 | 0        |
| SusHybrid:Infested:Uninfested-ResHybrid:Infested:Infested   | 0 | 0.010244 |
| SusHybrid:Infested:Infested-ResInbred:Infested:Infested     | 0 | 0.510234 |
| SusInbred:Infested:Infested-ResInbred:Infested:Infested     | 0 | 0.000566 |
| ResInbred:Control:Uninfested-ResInbred:Infested:Infested    | 1 | 0        |
| SusInbred:Control:Uninfested-ResInbred:Infested:Infested    | 0 | 0.005706 |
| ResInbred:Infested:Uninfested-ResInbred:Infested:Infested   | 1 | 0        |
| SusInbred:Infested:Uninfested-ResInbred:Infested:Infested   | 0 | 0.000004 |
| ResHybrid:Control:Uninfested-SusHybrid:Infested:Infested    | 0 | 0.477757 |
| SusHybrid:Control:Uninfested-SusHybrid:Infested:Infested    | 0 | 0.991473 |
| ResHybrid:Infested:Uninfested-SusHybrid:Infested:Infested   | 0 | 0.549387 |
| SusHybrid:Infested:Uninfested-SusHybrid:Infested:Infested   | 0 | 0.898356 |
| ResInbred:Control:Uninfested-SusInbred:Infested:Infested    | 0 | 0.000447 |
| SusInbred:Control:Uninfested-SusInbred:Infested:Infested    | 0 | 0.999946 |
| ResInbred:Infested:Uninfested-SusInbred:Infested:Infested   | 0 | 0.000895 |
| SusInbred:Infested:Uninfested-SusInbred:Infested:Infested   | 0 | 0.911522 |
| SusHybrid:Control:Uninfested-ResHybrid:Control:Uninfested   | 0 | 0.996857 |
| ResHybrid:Infested:Uninfested-ResHybrid:Control:Uninfested  | 1 | 0        |
| SusHybrid:Infested:Uninfested-ResHybrid:Control:Uninfested  | 0 | 0.01065  |
| SusInbred:Control:Uninfested-ResInbred:Control:Uninfested   | 0 | 0.004551 |
| ResInbred:Infested:Uninfested-ResInbred:Control:Uninfested  | 1 | 0        |
| SusInbred:Infested:Uninfested-ResInbred:Control:Uninfested  | 0 | 3.2E-06  |
| ResHybrid:Infested:Uninfested-SusHybrid:Control:Uninfested  | 0 | 0.998874 |
| SusHybrid:Infested:Uninfested-SusHybrid:Control:Uninfested  | 0 | 0.175766 |
| ResHybrid:Infested:Uninfested-SusInbred:Control:Uninfested  | 0 | 0.006694 |
| ResInbred:Infested:Uninfested-SusInbred:Control:Uninfested  | 0 | 0.008817 |
| SusInbred:Infested:Uninfested-SusInbred:Control:Uninfested  | 0 | 0.42876  |
| SusHybrid:Infested:Uninfested-ResHybrid:Infested:Uninfested | 0 | 0.014177 |
| SusInbred:Infested:Uninfested-ResInbred:Infested:Uninfested | 0 | 6.4E-06  |
